# Supplementary material
Source: publisher figshare collection journal article supplement (https://gsajournals.figshare.com/articles/dataset/_/12354695)
Supplement: Supplementary file 1 [file 1]

**Supplementary Table S2: Reporter gene constructs.**

Uppercase: exon; T inserted nucleotide; taat deleted sequence

| **Name** | **Plasmid name** | **Regulatory Sequence**  **(mutated nucleotides in red font)** | **Plasmid backbone** | **Transgene**  **name** | | **Ref.** |
| --- | --- | --- | --- | --- | --- | --- |
| *eat-4prom1::gfp* | pOH596 | aatgtcaacttcattcgttgtcccttcctttccccgtcttccctcacttccttttttctattttttccagtggtccgtagtgggcggcacccgattttgacttgaaatcagacccgtttccggttcttttggtagttgttaagttctgattctatgacgtggagtgaaacaaagaacgaccatatttcatgtgttgtgttttctaggcagtctaggcaggcagtaggcagatactgtcaaaattggaatatttccatcttctaaataccctcaactatttgttagcgcgtttgaaacaataattgcaaaacatttttttcgcattgattggggcattttgaaatttagagtaaaatcgactatcaactgtcattccataataattggcagaattattttggttatgccaccaaataatcaataaagaaagatttctgtccttattaaactaaaaattgaagcaacggtagagttgctgaacacagtcgccggcaaaattttttaattttctgcaaatttgaaattcttttgcgggtttttagttatggttctaatagtggttaaaagtcattataaaacacttcaattttttgtaatgctttcattcgcagtcgtgaagtcgtgaaaactcagttttcacctatcctaactttggaagtcgtccaaaaaattattttaattctacaattttatatttctttttaaacatacgatgtgatcaatcctacatcaattctgcaaatttctcacattcttggaagcttggtaatttatcagactttgactgaaaatttgaaaaaaaattcagtaatttttggagatccctttaaatattattctagcattgccatatagaataattgcaaaattcaattggtttcctagaaagaaaattagataatcttatgaaagagaacctaaccacaacaggtgttaaatattgatttaaacactaaaaaaagtctctccttctacctctcttctcatagctttcatgtcttgaagcttttcggttaattcgagcggaagacttatcaaggtacgtcattttcaattacttgtatacatctctcagcttcttctaattttccatgtacatcttagatattcttttttcagcgacttgatattaggaagttttgtgttttcaattttaaagttggattaatatagaataccagtctttaaacacaaaccaacaagggttcaatatcaaaatagaaaccgaaaaaaaatatcgaaaactgaaaaaatcaaatacatatctaaagcaagctattcgagaaatatttatgcattataacaactatgcagcgcttatatctttatttttcaacaagtgttccagcaacgagagtctcttcaccaaaaagccatctatcaaaaaccaggcagtgagtcctagaaccaagcttgtcagaagacaagtgcatgtataaataagtagtaaaagacgggtgggacccagcgcggtgagtagtagatcataaaaaagtgactgaaaagaaggggcgtttccttttctttattacctcttcctctacttcttctcatctcaacttgctttttccttcctcttacaacaactccatcatcatcatcatcattttcagaaacc | pPD95.75 | *otEx7198,*  *otEx7199* | | Serrano-Saiz et al 2013 |
| *eat-4prom2::gfp* | pOH597 | cggtagagttgctgaacacagtcgccggcaaaattttttaattttctgcaaatttgaaattcttttgcgggtttttagttatggttctaatagtggttaaaagtcattataaaacacttcaattttttgtaatgctttcattcgcagtcgtgaagtcgtgaaaactcagttttcacctatcctaactttggaagtcgtccaaaaaattattttaattctacaattttatatttctttttaaacatacgatgtgatcaatcctacatcaattctgcaaatttctcacattcttggaagcttggtaatttatcagactttgactgaaaatttgaaaaaaaattcagtaatttttggagatccctttaaatattattctagcattgccatatagaataattgcaaaattcaattggtttcctagaaagaaaattagataatcttatgaaagagaacctaaccacaacaggtgttaaatattgatttaaacactaaaaaaagtctctccttctacctctcttctcatagctttcatgtcttgaagcttttcggttaattcgagcggaagacttatcaaggtacgtcattttcaattacttgtatacatctctcagcttcttctaattttccatgtacatcttagatattcttttttcagcgacttgatattaggaagttttgtgttttcaattttaaagttggattaatatagaataccagtctttaaacacaaaccaacaagggttcaatatcaaaatagaaaccgaaaaaaaatatcgaaaactgaaaaaatcaaatacatatctaaagcaagctattcgagaaatatttatgcattataacaactatgcagcgcttatatctttatttttcaacaagtgttccagcaacgagagtctcttcaccaaaaagccatctatcaaaaaccaggcagtgagtcctagaaccaagcttgtcagaagacaagtgcatgtataaataagtagtaaaagacgggtgggacccagcgcggtgagtagtagatcataaaaaagtgactgaaaagaaggggcgtttccttttctttattacctcttcctctacttcttctcatctcaacttgctttttccttcctcttacaacaactccatcatcatcatcatcattttcagaaacc | pPD95.75 | *otEx7190, otEx7191* | | Serrano-Saiz et al 2013 |
| *eat-4prom26* | pOH598 | cggtagagttgctgaacacagtcgccggcaaaattttttaattttctgcaaatttgaaattcttttgcgggtttttagttatggttctaatagtggttaaaagtcattataaaacacttcaattttttgtaatgctttcattcgcagtcgtgaagtcgtgaaaactcagttttcacctatcctaactttggaagtcgtccaaaaaattattttaattctacaattttatatttctttttaaacatacgatgtgatcaatcctacatcaattctgcaaatttctcacattcttggaagcttggtaatttatcagactttgactgaaaatttgaaaaaaaattcagtaatttttggagatccctttaaatattattctagcattgccatatagaataattgcaaaattcaattggtttcctagaaagaaaattagataatcttatgaaagagaacctaaccacaacaggtgttaaatattgatttaaacactaaaaaaagtctctccttctacctctcttctcatagctttcatgtcttgaagcttttcggttaattcgagcggaagacttatcaaggtacgtcattttcaattacttgtatacatctctcagcttcttctaattttccatgtacatcttagatattcttttttcagcgacttgatattaggaagttttgtgttttcaattttaaagttggattaatatagaataccagtctttaaacacaaaccaacaagggttcaatatcaaaatagaaaccgaaaaaaaatatcgaaaactgaaaaaatcaaatacatatctaaagcaagctattcgagaaatatttatgcattataacaactatgcagcgcttatatctttatttttcaacaagtgttccagcaacgagagtctcttcaccaaaaagccatctatcaaaaaccaggcagtgagtcctagaaccaagcttgtcagaagacaagtgcatgtataaataagtagtaaaagacgggtgggacccagcgcggtgagtagtagatcataaaaaagtgactgaaaagaaggggcgtttccttttctttattacctcttcctctacttcttctcatctcaacttgctttttccttcctcttacaacaactccatcatcatcatcatcattttcagaaacc | pPD95.75 | *otEx5345, otEx5346, otEx5347* | | Serrano-Saiz et al 2013 |
| *eat-4prom27* | pOH599 | cggtagagttgctgaacacagtcgccggcaaaattttttaattttctgcaaatttgaaattcttttgcgggtttttagttatggttctaatagtggttaaaagtcattataaaacacttcaattttttgtaatgctttcattcgcagtcgtgaagtcgtgaaaactcagttttcacctatcctaactttggaagtcgtccaaaaaattattttaattctacaattttatatttctttttaaacatacgatgtgatcaatcctacatcaattctgcaaatttctcacattcttggaagcttggtaatttatcagactttgactgaaaatttgaaaaaaaattcagtaatttttggagatccctttaaatattattctagcattgccatatagaataattgcaaaattcaattggtttcctagaaagaaaattagataatcttatgaaagagaacctaaccacaacaggtgttaaatattgatttaaacactaaaaaaagtctctccttctacctctcttctcatagctttcatgtcttgaagcttttcggttaattcgagcggaagacttatcaaggtacgtcattttcaattacttgtatacatctctcagcttcttctaattttccatgtacatcttagatattcttttttcagcgacttgatattaggaagttttgtgttttcaattttaaagttggattaatatagaataccagtctttaaacacaaaccaacaagggttcaatatcaaaatagaaaccgaaaaaaaatatcgaaaactgaaaaaatcaaatacatatctaaagcaagctattcgagaaatatttatgcattataacaactatgcagcgcttatatctttatttttcaacaagtgttccagcaacgagagtctcttcaccaaaaagccatctatcaaaaaccaggcagtgagtcctagaaccaagcttgtcagaagacaagtgcatgtataaataagtagtaaaagacgggtgggacccagcgcggtgagtagtagatcataaaaaagtgactgaaaagaaggggcgtttccttttctttattacctcttcctctacttcttctcatctcaacttgctttttccttcctcttacaacaactccatcatcatcatcatcattttcagaaacc | pPD95.75 | *otEx5098, otEx5099, otEx5100* | | Serrano-Saiz et al 2013 |
| *eat-4prom211* | pOH600 | cggtagagttgctgaacacagtcgccggcaaaattttttaattttctgcaaatttgaaattcttttgcgggtttttagttatggttctaatagtggttaaaagtcattataaaacacttcaattttttgtaatgctttcattcgcagtcgtgaagtcgtgaaaactcagttttcacctatcctaactttggaagtcgtccaaaaaattattttaattctacaattttatatttctttttaaacatacgatgtgatcaatcctacatcaattctgcaaatttctcacattcttggaagcttggtaatttatcagactttgactgaaaatttgaaaaaaaattcagtaatttttggagatccctttaaatattattctagcattgccatatagaataattgcaaaattcaattggtttcctagaaagaaaattagataatcttatgaaagagaacctaaccacaacaggtgttaaatattgatttaaacactaaaaaaagtctctccttctacctctcttctcatagctttcatgtcttgaagcttttcggttaattcgagcggaagacttatcaaggtacgtcattttcaattacttgtatacatctctcagcttcttctaattttccatgtacatcttagatattcttttttcagcgacttgatattaggaagttttgtgttttcaattttaaagttggattaatatagaataccagtctttaaacacaaaccaacaagggttcaatatcaaaatagaaaccgaaaaaaaatatcgaaaactgaaaaaatcaaatacatatctaaagcaagctattcgagaaatatttatgcattataacaactatgcagcgcttatatctttatttttcaacaagtgttccagcaacgagagtctcttcaccaaaaagccatctatcaaaaaccaggcagtgagtcctagaaccaagcttgtcagaagacaagtgcatgtataaataagtagtaaaagacgggtgggacccagcgcggtgagtagtagatcataaaaaagtgactgaaaagaaggggcgtttccttttctttattacctcttcctctacttcttctcatctcaacttgctttttccttcctcttacaacaactccatcatcatcatcatcattttcagaaacc | pPD95.75 | *otEx5316, otEx5317* | | Serrano-Saiz et al 2013;  Masoudi et al. 2018 |
| *eat-4prom212* | pOH601 | cggtagagttgctgaacacagtcgccggcaaaattttttaattttctgcaaatttgaaattcttttgcgggtttttagttatggttctaatagtggttaaaagtcattataaaacacttcaattttttgtaatgctttcattcgcagtcgtgaagtcgtgaaaactcagttttcacctatcctaactttggaagtcgtccaaaaaattattttaattctacaattttatatttctttttaaacatacgatgtgatcaatcctacatcaattctgcaaatttctcacattcttggaagcttggtaatttatcagactttgactgaaaatttgaaaaaaaattcagtaatttttggagatccctttaaatattattctagcattgccatatagaataattgcaaaattcaattggtttcctagaaagaaaattagataatcttatgaaagagaacctaaccacaacaggtgttaaatattgatttaaacactaaaaaaagtctctccttctacctctcttctcatagctttcatgtcttgaagcttttcggttaattcgagcggaagacttatcaaggtacgtcattttcaattacttgtatacatctctcagcttcttctaattttccatgtacatcttagatattcttttttcagcgacttgatattaggaagttttgtgttttcaattttaaagttggattaatatagaataccagtctttaaacacaaaccaacaagggttcaatatcaaaatagaaaccgaaaaaaaatatcgaaaactgaaaaaatcaaatacatatctaaagcaagctattcgagaaatatttatgcattataacaactatgcagcgcttatatctttatttttcaacaagtgttccagcaacgagagtctcttcaccaaaaagccatctatcaaaaaccaggcagtgagtcctagaaccaagcttgtcagaagacaagtgcatgtataaataagtagtaaaagacgggtgggacccagcgcggtgagtagtagatcataaaaaagtgactgaaaagaaggggcgtttccttttctttattacctcttcctctacttcttctcatctcaacttgctttttccttcctcttacaacaactccatcatcatcatcatcattttcagaaacc | pPD95.75 | *otEx7194,*  *otEx7195* | | Serrano-Saiz et al 2013;  Masoudi et al. 2018 |
| *eat-4prom4* | pO602 | cgttcttccgaatcctcggagctcagtttgaaattgctgctctatgcttacaaccttgctacatatattacagaattttagattcaaaacttaaatcttaaaagttgaatagttaattgagcaatatattttttttggaattttgagaacacttaaaactagaacccaaaatttctcaacaattttttatggcgattcaaaatttctaataaaacggtctaccattttgagtctattatagccgaaaatctccaatgtgactgtgacttcttaaaactactaaaacattatttgtccatttacatcttcctaaaaccgtatatcatcaaaaacattcacaaaatccgaaaaatgagacaaaaatttttttttgattgttattgcaataaatctaataaaaatattcatatattgcctggcgccccccatatctccatttccggtcccatcacccccacacctccaagattgataggtggctataagcattttttgcatttgaatgtgttgcaccagtagtcatcatcatcattatctaaactgacgtgatagtagggggctttctagaagtcgattttctattaatgtcaacttcattcg | pPD95.75 | strain  not available | | Serrano-Saiz et al 2013 |
| *eat-4prom5* | pOH603 | atcacttgtctaggagaatatattctagctattcaattagtttggatatattatgactgaaaactcgggccaagttttacaaactcatagatcaatataaaatatccggatgcaacctgaccattaatagaaaacaatattagagataactgtgtggtgttcatttgttgatatgcttttcgtacatatgtacttttcatatacctcttgcaaattgttatgcatctaatcacctttatccatgaagaaagcgatattcttggcaagaaaagttttgtgcttcctcccgactgcgtgctaaaagccaaataaattatcgcgccgaggactcgagactgactgaataattttatttatgtgtttcccttctcctgacgtgtcgcaattactttttccctgtgtgtgtgtgtgtgtgaggtgaaaggcgtcgccgtcgagtgtgtgtgtgtgtgtgctcggagagccgtaattcaaaacttgttgaaaaagctgtgtgtgggggcacaagtcactagaaaaattgagaggttgaaaggtttttgagagaacaaccgaaaaaggtgacgatttatgagttggaaaggtctggggtgccatccgtctatttccagaatgaagtagatctgacaaagggataaacttgaagtttgtcattttgacaaaatatcaaccatatttgataaattagaattcaaggttttgaaaatttggttaaagcgttcgattctaaaccaaaggtcatcagtaaaaattattttttatccaatctatattctatggttgaggtgaaaagttcgtcagtaggaatcttgtataaaaccgctcctatatagtgctaaaatacccaatcaaagaaacactttttggaaacgtttttttgaaagttttttttaagtgaaagtcgaccaaaaatttttttcatgatctcttttttctatttaacctaggagttcctaggagttcgaaactgcagcaatgatcgaactttctcaaaattccagatttttgaaaaacttgccagtttaccaaatcgttgactggaagttttgagaaatccaaaattttgagctgttttttttagtgatatttagtgatgaccgtatttaaaaactgaaactttaaaaaaacatcaattttctaagttcatccctcactaaagagacgcagatatggtgattcgaagagcctacaaaactactaccaacaacacatatttcccgtttaatcaactaatgagattttcatgttcttttcattgtcgcgcattgactgcttacacctttttcttatgtttgtttatgttcatgtaagcaaaaagaatgaacaagtcggtgacttcagatgactacgttcttccgaatcctcggagctcagtttgaaattgctgctctatg | pPD95.75 | *otEx5292, otEx5293, otEx5294* | | Serrano-Saiz et al 2013 |
| *eat-4prom6::gfp* | pOH604 | gatatctagtaaaagaggatgcgctaatccgatcgttgtgcttaaatctgagcaaagtggaggaaagaagagagatagaaaaagagccatcaacactcattttcactttttttgacattcatcataatccctgatactggtggacttctttcggatattgttttttacatttatttcgaatttgtcattttttataagcccaggtttgcatttttttttaaagttattacagctggaattttgggattttcctgttttcaactgaagtaatgtactgaaaatagcaaaattatttcttcaactaactgtaactttttgaaactctgcataaaaacagtagcttttgaaatatagactttaaaactttcgaataaatttttctaattttccactcacaatactcaaactataatactcaaacttataatactcaaactaacaaacctcaaaaaattaatgaagtacttaaacgaaacctgtaactttaagaagttcatgcaactggctttctgagatcacagaaattctgccaatttggattctaaatctgaaaattttgcatctgaaaacttggcaccaatcatttacgattccatatctcccttgaaaaagctatatgaaaacttgatctgggttcagtacacaatcttcagactcttcagtccaggcctaaagaccaaacgggcaaattttttggttttgagaagctgaagcgctgaagaaagtgtactattttcgtcaaggctacaatccgtctagtggttcattgccaaacaaagttttaaaaatctaaaaactatcaatcctaatgttctttttctaacattcagccagagaaacgcttcacactctgtattttccaaaatttattgcagaattgaatgtttattacatgtttagttgatatc | pPD95.75 | *otIs362* | | Serrano-Saiz et al 2013 |
| *eat-4prom7::gfp* | pOH605 | atcatcagagcgtctagttgttatccttataaactttatgaattgttttgtcttattcataatccgtctgaatttttgttgatttagattttgctccgatgcgaatactgtacggtatccggtttcgacacatcaaatttttattaaatgcaaacggtgtgcacctttgaagtgtactgtaattttcaatcaaccatgtctgtggaattttctatgatttttcactacttggaaagtgagatataatttttctcgaaaaaagacttccagcttgagaaactcaaatttgtttcagattgtaaatctccaaaaattgaagaaatttctgaaaaaatgcagtcaaacctttgcaaaaacaatttcctattgtcattttcccgatcatatttccttgttcatcaatttcactctttgcttcttccgtttcgacttgaatttccttcaatgtcattggatcttctccacgaagaaatcaaaaccatagtttttattccctttttcatttattttctctaaaaactaaaatcataaaaacagcaaatgaaaaaaggaaaacactggttgatgatgatgatgatatgagggat | pPD95.75 | *otIs487* | | Serrano-Saiz et al 2013 |
| *eat-4prom71* | pOH606 | atcatcagagcgtctagttgttatccttataaactttatgaattgttttgtcttattcataatccgtctgaatttttgttgatttagattttgctccgatgcgaatactgtacggtatccggtttcgacacatcaaatttttattaaatgcaaacggtgtgcacctttgaagtgtactgtaattttcaatcaaccatgtctgtggaattttctatgatttttcactacttggaaagtgagatataatttttctcgaaaaaagacttccagcttgagaaactcaaatttgtttcagattgtaaatctccaaaaattgaagaaatttctgaaaaaatgcagtcaaacctttgcaaaaacaatttcctattgtcattttcccgatcatatttccttgttcatcaatttcactctttgcttcttccgtttcgacttgaatttccttcaatgtcattggatcttctccacgaagaaatcaaaaccatagtttttattccctttttcatttattttctctaaaaactaaaatcataaaaacagcaaatgaaaaaaggaaaacactggttgatgatgatgatgatatgagggat | pPD95.75 | strain  not available | | This paper |
| *eat-4prom72* | pOH607 | atcatcagagcgtctagttgttatccttataaactttatgaattgttttgtcttattcataatccgtctgaatttttgttgatttagattttgctccgatgcgaatactgtacggtatccggtttcgacacatcaaatttttattaaatgcaaacggtgtgcacctttgaagtgtactgtaattttcaatcaaccatgtctgtggaattttctatgatttttcactacttggaaagtgagatataatttttctcgaaaaaagacttccagcttgagaaactcaaatttgtttcagattgtaaatctccaaaaattgaagaaatttctgaaaaaatgcagtcaaacctttgcaaaaacaatttcctattgtcattttcccgatcatatttccttgttcatcaatttcactctttgcttcttccgtttcgacttgaatttccttcaatgtcattggatcttctccacgaagaaatcaaaaccatagtttttattccctttttcatttattttctctaaaaactaaaatcataaaaacagcaaatgaaaaaaggaaaacactggttgatgatgatgatgatatgagggat | pPD95.75 | strain  not available | | This paper |
| *eat-4prom73* | pOH608 | atcatcagagcgtctagttgttatccttataaactttatgaattgttttgtcttattcataatccgtctgaatttttgttgatttagattttgctccgatgcgaatactgtacggtatccggtttcgacacatcaaatttttattaaatgcaaacggtgtgcacctttgaagtgtactgtaattttcaatcaaccatgtctgtggaattttctatgatttttcactacttggaaagtgagatataatttttctcgaaaaaagacttccagcttgagaaactcaaatttgtttcagattgtaaatctccaaaaattgaagaaatttctgaaaaaatgcagtcaaacctttgcaaaaacaatttcctattgtcattttcccgatcatatttccttgttcatcaatttcactctttgcttcttccgtttcgacttgaatttccttcaatgtcattggatcttctccacgaagaaatcaaaaccatagtttttattccctttttcatttattttctctaaaaactaaaatcataaaaacagcaaatgaaaaaaggaaaacactggttgatgatgatgatgatatgagggat | pPD95.75 | strain  not available | | This paper |
| *eat-4prom74* | pOH609 | atcatcagagcgtctagttgttatccttataaactttatgaattgttttgtcttattcataatccgtctgaatttttgttgatttagattttgctccgatgcgaatactgtacggtatccggtttcgacacatcaaatttttattaaatgcaaacggtgtgcacctttgaagtgtactgtaattttcaatcaaccatgtctgtggaattttctatgatttttcactacttggaaagtgagatataatttttctcgaaaaaagacttccagcttgagaaactcaaatttgtttcagattgtaaatctccaaaaattgaagaaatttctgaaaaaatgcagtcaaacctttgcaaaaacaatttcctattgtcattttcccgatcatatttccttgttcatcaatttcactctttgcttcttccgtttcgacttgaatttccttcaatgtcattggatcttctccacgaagaaatcaaaaccatagtttttattccctttttcatttattttctctaaaaactaaaatcataaaaacagcaaatgaaaaaaggaaaacactggttgatgatgatgatgatatgagggat | pPD95.75 | strain  not available | | This paper |
| *eat-4prom8::tagRFP* | pOH610 | ggattgaagtagctcactgatggatcgtaatttattggaaaaatgacgttcagaataaatttgatattgattaatttttgtccacattctagtaggccaggcaggcgaggcgtgcgaggacgcctcaggcaagcacaaagaagaagaataaacaggcatgtaaacagtaggcatgcagaaggcgtgtaggcatgaacataggtgtgaaactttcctttaacatattgttgtgttcaaaactttgtatcgcttatcaatttttacaaaggattctgtgatgttaatgtgaaatgataaatttaacaatcaaattgtttttctcctgaaccccctggaatgcctataaccaagtaaactaaaaggtgttttagcccccttcacttctctttcccttccattacctcttgtttctgccttttaatccaactttccacaagttgctccccttttttcctttttttccatagccactttgctgtcattgaaggcaccttttttgtgtcacactccgcccatttagggtgaaaagttcggagagtgttttcctttttttagttttcagcattgtaggtttcatttaatctttgatatc | pOH595 | *otIs521* | | Serrano-Saiz et al 2013 |
| *eat-4prom9* | na | gtaaaagacgggtgggacccagcgcggtgagtagtagatcataaaaaagtgactgaaaagaaggggcgtttccttttctttattacctcttcctctacttcttctcatctcaacttgctttttccttcctcttacaacaactccatcatcatcatcatcattttcagaaacc | pPD95.75 | *otIs461* | | Oren-Suissa et al 2016 |
| *eat-4prom10* | pOH611 | atgcattataacaactatgcagcgcttatatctttatttttcaacaagtgttccagcaacgagagtctcttcaccaaaaagccatctatcaaaaaccaggcagtgagtcctagaaccaagcttgtcagaagacaagtgcatgtataaataagtagtaaaagacgggtgggacccagcgcggtgagtagtagatcataaaaaagtgactgaaaagaaggggcgtttccttttctttattacctcttcctctacttcttctcatctcaacttgctttttccttcctcttacaacaactccatcatcatcatcatcattttcagaaacc | pPD95.75 | *otEx5310* | | This paper |
| *eat-4prom11* | pOH612 | gtcgaccaaaaatttttttcatgatctcttttttctatttaacctaggagttcctaggagttcgaaactgcagcaatgatcgaactttctcaaaattccagatttttgaaaaacttgccagtttaccaaatcgttgactggaagttttgagaaatccaaaattttgagctgttttttttagtgatatttagtgatgaccgtatttaaaaactgaaactttaaaaaaacatcaattttctaagttcatccctcactaaagagacgcagatatggtgattcgaagagcctacaaaactactaccaacaacacatatttcccgtttaatcaactaatgagattttcatgttcttttcattgtcgcgcattgactgcttacacctttttcttatgtttgtttatgttcatgtaagcaaaaagaatgaacaagtcggtgacttcagatgactacgttcttccgaatcctcggagctcagtttgaaattgctgctctatg | pPD95.75 | *otIs519,*  *otIs520* | | Serrano-Saiz et al 2017 |
| *eat-4prom12* | pOH613 | catcattttcagaaaccATGTCGTCATGGAACGAGGCTTGGGATCGTGGCAAACAAATGGTTGGAGAGCCACTCGCCAAgtgagtttcttttgagattttttgtccaccatttccggagcccaacacaacaaaaaggcacacggccgtgaaattggtggggctgaatgagcgcacatacctctcaagcattaacatttttttcgattccatatctcaactaatttcagAATGATCTGCAGCAGCTGCAT | pPD95.75 | *otIs557* | | Serrano-Saiz et al 2013 |
| *eat-4prom13::gfp* | pOH614 | atcacttgtctaggagaatatattctagctattcaattagtttggatatattatgactgaaaactcgggccaagttttacaaactcatagatcaatataaaatatccggatgcaacctgaccattaatagaaaacaatattagagataactgtgtggtgttcatttgttgatatgcttttcgtacatatgtacttttcatatacctcttgcaaattgttatgcatctaatcacctttatccatgaagaaagcgatattcttggcaagaaaagttttgtgcttcctcccgactgcgtgctaaaagccaaataaattatcgcgccgaggactcgagactgactgaataattttatttatgtgtttcccttctcc | pPD95.75 | *otEx5878* | | Serrano-Saiz et al 2017 |
| *eat-4prom14::gfp* | pOH615 | tgacgtgtcgcaattactttttccctgtgtgtgtgtgtgtgtgaggtgaaaggcgtcgccgtcgagtgtgtgtgtgtgtgtgctcggagagccgtaattcaaaacttgttgaaaaagctgtgtgtgggggcacaagtcactagaaaaattgagaggttgaaaggtttttgagagaacaaccgaaaaaggtgacgatttatgagttggaaaggtctggggtgccatccgtctatttccagaatgaagtagatctgacaaagggataaacttgaagtttgtcattttgacaaaatatcaaccatatttgataaattagaattcaaggttttgaaaatttggttaaagcgttcgattctaaaccaaaggtcatcagtaaaaattattttttatccaatctatattctatggttgaggtgaaaagttcgtcagtaggaatcttgtataaaaccgctcctatatagtgctaaaatacccaatcaaagaaacactttttggaaacgtttttttgaaagttttttttaagtgaaa | pPD95.75 | *otIs558* | | Serrano-Saiz et al 2017 |
| *eat-4prom15::gfp* | pOH616 | acttccagcttgagaaactcaaatttgtttcagattgtaaatctccaaaaattgaagaaatttctgaaaaaatgcagtcaaacctttgcaaaaacaatttcctattgtcattttcccgatcatatttccttgttcatcaatttcactctttgcttcttccgtttcgacttgaatttccttcaatgtcattggatcttctccacgaagaaatcaaaaccatagtttttattccctttttcatttattttctctaaaaactaaaatcataaaaacagcaaatgaaaaaaggaaaacactggttgatgatgatgatgatatgagggat | pPD95.75 | *otEx5763, otEx5764* | | This paper |
|  | | | | | | |
| *unc-17*  *prom1::tagrfp* | pOH617 | agtatattaatttagaacaattccgaaaattttttttttaattgagcaattttttaaacttttttttcaaaattttgttttgaatttgaattattttaatatagtaatttcgaacatttacatcattatgcttttactgtactttttaataatgaaataaaaatagaatttttgaaaaatattgcattttttaggaaaaaaattaaaaaaagaatagtttggataattttttggttttctaaattttttttacttcctaagcctaatcctaagtttaagccagcgcccaagctaagccaaagaatgagcgtaagcctaagcctaagcctgagcctaagacttaaaaaaccgggaaactttttttttctgatttttttttgacaatttacagtcgaataattttcaaaaaaaaatgatttttttaaattctgcattattattttcaaaacttttttcccgattgcccaaaacgtctccccttttccaaaaaaaagagcatctcatctcaatctccggaggtttcgaaaaatccgttcccatccgcttcatccaaaagcggcgttcacatcccccgaaatttccaaaaaaaacgtatacaccaatcatttctcccctccgaaatgtgtagtcgtcatgacaaagtggtgacactggattacggtaggctccgcccacttcttggaaaagtgacgtgggctcggtgagccctaaagcttttggttttcacaattttctggtttttgggatttttgcgggaattttgagaggagaaagttgggagagaagatattggaatggtccccggggagctgtacatttatacatctagactgaagctggggtattgcaaaaagagaaaagcctatcactttctttccatcctgcatacttgccaaaaagttttggctgagcttatttttaaaattggaattttttggaattttcagaaaagaaaaagttttttctttttttttaatttaaaaaatttttgctatttattgcatggtactacagaaaaacttgaatgaaataaaaaatttggaaaattcaagaaaactttttttttcatagtttatttattcgagttttaatgtggcttttattttgttcggtttttgttttaaaaagattttatacaaaatttcaagaatttacaatttttccgttgtaaaaaatccaaaaaaaaatccaaaaaaatagttcagacctttttttaaattttaaatttaaaaattcaataccaaaaaattaaaaaaaattagtttttccgagaataaaggaaaaatgttgaaaaaatattatatataaaatttccagaaaatgtgaaaactccaaaaaactgcagacttttccccaaactagctattttttgaattcattacctttaaaggtggagtaccgaaatttaagactttgcttttttagacccaaaatggtccaaaactaccaaatttcgtaatgagacgttctgaaaatttttcaaaaaaatgttatgggagctcaaagtttttgaaaaaatggtatatttttagctaattttaaccacttcttggcgtcgcagcggttggaactcaattttaattaaattatcatccttcaatgtccttcaatctttgcaatttcaatcgaccatacgcgttcagagcatttttttttttcgtttttcctcccgtccagcacatatttaaatattctctctccccctcccctggttcctaaaaacttgggaaaggggaatttcgaaggaggtggaagcttcttcttctccccgagcacacacacacatcctctcttcaaaatctttaagaaatagtgcgtgtgaatgactagacgctgaagctaacttggtttccgcgaacaatcccaatcagtgcctgtgccgaggcttcggagaagaagagattgacgtcgtctttttctttttttgtgaaacagaataaaaaagaatacgaaatggactttttcacacattttcgttacttttccagaaaaaaacgaagctctagccatggaagtttgaattgaaaacctaaaccccgatgtgtattcatttgagcttaagcctaagcctaattctacgcctaagcataagcctaagcctatgttcaagcctaagccaaattgtagaacgttaccaaaagatcaaacctatttttcctacagaaaaggtctaatgataactgttaagcgagagacaaggagagatatatatcaaaaactagcccaaactgtgattaacatctattaactgacctcaaaaaaaaaaatagtagagattaaatactgctcaaaaagtttcttggaaaagtaaattgttaggtttctggggcctgtaaaactggaccgagttttgaagaatttttttaacttttcaaagtttggcgtcactgaaagctttatattgtacatgttccaccaattttcttttgtatccgttttttctgtctcaaaacggagctcgagcccatgacgtgtggataccgtgagaatccgcccaattccttcacatcgatctcatatttctttcccagtttatattgaattcccgttgaattgcggctttgcaggggagaagatgtgcgtctttatatttttttttctatccttacccgccgtgaatccggctcgaattgagccaatttttatgaatagtagagctaattgacttcgtctccctagaattgatgaggtaaagctcgtggggagatatggagatttttcgattttttttccagtaattttcagttcaaaatttgagcttttgagcaggagttttgagatttgtgccaaaatttcctattattttttcaaatatttttgcttttgtaaaaaaggtgtagtagaagttttgtagtgccactattttttttttgaaaattatgttttggcggaaagttctttaaaaaagttaatcaaaatttttggcgctttagtcaaattaattttctggcaaaaatattagtaattttggcgtgagttcaattttcccattcttaaaatttcacacaattaagaattttaagatttgggtttttttttcaacaaaaaatcaaatatttacatgaaaattcggcgggaaataaaaaaaaatattccgattcaatgtgtgaataactttttgcggggaattcaaatttgcattatttaaactttttttaagctcgaaaaattgaaattcttaaataaataaataaaattttcctcgaattttgaatgtttcgattttttagcgttattttttcaaaatttccactaaaactctagttctaaagttctaaaactttaaaaacttcctaatgttgtggtcttgtgtttttttggcagcgatttccaaatttctgaaattccaacaaaaaaaccactacgtcagtttgcatatccaacccccccccccccccccccccctctgagccaatcaatcatgtgcattttgaattggcgccaaggcaatcttcgtaaaaaataacaatagagtcatccctcagaacagaaaagaaacccgcccgggggctcaaatacacatgtcatttttcttttttcgcctgatttttagcctaaattagtgtttagcaattttttaaggtaactcggtggagtcatttgaactttttaaactaaaatttcagaaaaaattctttttttttgtcaaaaaataattttcccgccggaatttttcaaaaaaataatttttattttatttttcaagttccttgtttcctctttatttttttattttgcccccaaaagttttacactaaaatatttaattttcaggtaattcatcgaaagtctttctattttccgcatctcttgttcaaaatagtaacctactaaaacaaggtgagcctaattttttttaaatactgtatttccaaaaagtagtcataagatatattatgaaaattttcaagaatcttcgtacaatattttggcagaaaatttgaattttgaaattttttggtaaattttcctggaatatttgaaattaatttttggcgccagtttcaaaacataaaatttagaattttttttaagttttgaaaaaaatttttcaacaaattttggcggtaatttgtgaatttctttttttttaaacatatttcgaaaaaattattttgacataattttttcaataaaaaaatttgcacaaagtttaaaataagttgttcaaaaaattttctagaatctcgatttaaaaaatttctgacgaatatgccgcaaacttacatattagaaaaaaaattggcgggaaataaaagaacacagaatttttcataaaattttaaataatttggcgcaaagtctaaaaattgttctgaaaaagatgttttttcgacaaaattcgaatttatcaattttctaaaaaaatatttccaaagaaagagtttagcgcgaatttgaaatttttgaaaaagtgacagttgtcatactcaattatttgcaaaaaatttttaaataagacaattggcgcgaagttcaaaaattccagaaaaaattttgcgcaaaagtcaaaattttgagagtttttggcgcgaaattcatatttttcaaaaaaaaattggcgggctatacaaaaattcaaaaaaattcggcaaaaaatacaaaatttttaacatgttcaacaactaaaccaccaagaagttcctctttaaaaaaatttccaaaaattacaaactcctcctgtattacctgtatttccactacctttcttatattaattttctcaattttctcctgtatttctctgtctctcccctccccaacaagccttatacgtgtgtttttcctcaaaactgggcgtggtctcggcggccctctggcgatctgtgtctcccctaagtctctctctcccccatacaatgggtctcacggctctgttacgcgccgagccacgtcataagttttctttaaatttttttttgtttgagaaaaagcccctaggccagcccgaagcccaaaaaatttagaaaaaataaaatattccagggggagagagagag | pOH596 | *otEx6974, otEx6975* | | This paper |
| *unc-17*  *prom2::tagrfp* | pOH618 | gcatggtactacagaaaaacttgaatgaaataaaaaatttggaaaattcaagaaaactttttttttcatagtttatttattcgagttttaatgtggcttttattttgttcggtttttgttttaaaaagattttatacaaaatttcaagaatttacaatttttccgttgtaaaaaatccaaaaaaaaatccaaaaaaatagttcagacctttttttaaattttaaatttaaaaattcaataccaaaaaattaaaaaaaattagtttttccgagaataaaggaaaaatgttgaaaaaatattatatataaaatttccagaaaatgtgaaaactccaaaaaactgcagacttttccccaaactagctattttttgaattcattacctttaaaggtggagtaccgaaatttaagactttgcttttttagacccaaaatggtccaaaactaccaaatttcgtaatgagacgttctgaaaatttttcaaaaaaatgttatgggagctcaaagtttttgaaaaaatggtatatttttagctaattttaaccacttcttggcgtcgcagcggttggaactcaattttaattaaattatcatccttcaatgtccttcaatctttgcaatttcaatcgaccatacgcgttcagagcatttttttttttcgtttttcctcccgtccagcacatatttaaatattctctctccccctcccctggttcctaaaaacttgggaaaggggaatttcgaaggaggtggaagcttcttcttctccccgagcacacacacacatcctctcttcaaaatctttaagaaatagtgcgtgtgaatgactagacgctgaagctaacttggtttccgcgaacaatcccaatcagtgcctgtgccgaggcttcggagaagaagagattgacgtcgtctttttctttttttgtgaaacagaataaaaaagaatacgaaatggactttttcacacattttcgttacttttccagaaaaaaacgaagctctagccatggaagtttgaattgaaaacctaaaccccgatgtgtattcatttgagcttaagcctaagcctaattctacgcctaagcataagcctaagcctatgttcaagcctaagccaaattgtagaacgttaccaaaagatcaaacctatttttcctacagaaaaggtctaatgataactgttaagcgagagacaaggagagatatatatcaaaaactagcccaaactgtgattaacatctattaactgacctcaaaaaaaaaaatagtagagattaaatactgctcaaaaagtttcttggaaaagtaaattgttaggtttctggggcctgtaaaactggaccgagttttgaagaatttttttaacttttcaaagtttggcgtcactgaaagctttatattgtacatgttccaccaattttcttttgtatccgttttttctgtctcaaaacggagctcgagcccatgacgtgtggataccgtgagaatccgcccaattccttcacatcgatctcatatttctttcccagtttatattgaattcccgttgaattgcggctttgcaggggagaagatgtgcgtctttatatttttttttctatccttacccgccgtgaatccggctcgaattgagccaatttttatgaatagtagagctaattgacttcgtctccctagaattgatgaggtaaagctcgtggggagatatggagatttttcgattttttttccagtaattttcagttcaaaatttgagcttttgagcaggagttttgagatttgtgccaaaatttcctattattttttcaaatatttttgcttttgtaaaaaaggtgtagtagaagttttgtagtgccactattttttttttgaaaattatgttttggcggaaagttctttaaaaaagttaatcaaaatttttggcgctttagtcaaattaattttctggcaaaaatattagtaattttggcgtgagttcaattttcccattcttaaaatttcacacaattaagaattttaagatttgggtttttttttcaacaaaaaatcaaatatttacatgaaaattcggcgggaaataaaaaaaaatattccgattcaatgtgtgaataactttttgcggggaattcaaatttgcattatttaaactttttttaagctcgaaaaattgaaattcttaaataaataaataaaattttcctcgaattttgaatgtttcgattttttagcgttattttttcaaaatttccactaaaactctagttctaaagttctaaaactttaaaaacttcctaatgttgtggtcttgtgtttttttggcagcgatttccaaatttctgaaattccaacaaaaaaaccactacgtcagtttgcatatccaacccccccccccccccccccccctctgagccaatcaatcatgtgcattttgaattggcgccaaggcaatcttcgtaaaaaataacaatagagtcatccctcagaacagaaaagaaacccgcccgggggctcaaatacacatgtcatttttcttttttcgcctgatttttagcctaaattagtgtttagcaattttttaaggtaactcggtggagtcatttgaactttttaaactaaaatttcagaaaaaattctttttttttgtcaaaaaataattttcccgccggaatttttcaaaaaaataatttttattttatttttcaagttccttgtttcctctttatttttttattttgcccccaaaagttttacactaaaatatttaattttcaggtaattcatcgaaagtctttctattttccgcatctcttgttcaaaatagtaacctactaaaacaaggtgagcctaattttttttaaatactgtatttccaaaaagtagtcataagatatattatgaaaattttcaagaatcttcgtacaatattttggcagaaaatttgaattttgaaattttttggtaaattttcctggaatatttgaaattaatttttggcgccagtttcaaaacataaaatttagaattttttttaagttttgaaaaaaatttttcaacaaattttggcggtaatttgtgaatttctttttttttaaacatatttcgaaaaaattattttgacataattttttcaataaaaaaatttgcacaaagtttaaaataagttgttcaaaaaattttctagaatctcgatttaaaaaatttctgacgaatatgccgcaaacttacatattagaaaaaaaattggcgggaaataaaagaacacagaatttttcataaaattttaaataatttggcgcaaagtctaaaaattgttctgaaaaagatgttttttcgacaaaattcgaatttatcaattttctaaaaaaatatttccaaagaaagagtttagcgcgaatttgaaatttttgaaaaagtgacagttgtcatactcaattatttgcaaaaaatttttaaataagacaattggcgcgaagttcaaaaattccagaaaaaattttgcgcaaaagtcaaaattttgagagtttttggcgcgaaattcatatttttcaaaaaaaaattggcgggctatacaaaaattcaaaaaaattcggcaaaaaatacaaaatttttaacatgttcaacaactaaaccaccaagaagttcctctttaaaaaaatttccaaaaattacaaactcctcctgtattacctgtatttccactacctttcttatattaattttctcaattttctcctgtatttctctgtctctcccctccccaacaagccttatacgtgtgtttttcctcaaaactgggcgtggtctcggcggccctctggcgatctgtgtctcccctaagtctctctctcccccatacaatgggtctcacggctctgttacgcgccgagccacgtcataagttttctttaaatttttttttgtttgagaaaaagcccctaggccagcccgaagcccaaaaaatttagaaaaaataaaatattccagggggagagagagag | pOH596 | *otEx6976* | | This paper |
| *unc-17*  *prom3::tagrfp* | pOH619 | ctctagccatggaagtttgaattgaaaacctaaaccccgatgtgtattcatttgagcttaagcctaagcctaattctacgcctaagcataagcctaagcctatgttcaagcctaagccaaattgtagaacgttaccaaaagatcaaacctatttttcctacagaaaaggtctaatgataactgttaagcgagagacaaggagagatatatatcaaaaactagcccaaactgtgattaacatctattaactgacctcaaaaaaaaaaatagtagagattaaatactgctcaaaaagtttcttggaaaagtaaattgttaggtttctggggcctgtaaaactggaccgagttttgaagaatttttttaacttttcaaagtttggcgtcactgaaagctttatattgtacatgttccaccaattttcttttgtatccgttttttctgtctcaaaacggagctcgagcccatgacgtgtggataccgtgagaatccgcccaattccttcacatcgatctcatatttctttcccagtttatattgaattcccgttgaattgcggctttgcaggggagaagatgtgcgtctttatatttttttttctatccttacccgccgtgaatccggctcgaattgagccaatttttatgaatagtagagctaattgacttcgtctccctagaattgatgaggtaaagctcgtggggagatatggagatttttcgattttttttccagtaattttcagttcaaaatttgagcttttgagcaggagttttgagatttgtgccaaaatttcctattattttttcaaatatttttgcttttgtaaaaaaggtgtagtagaagttttgtagtgccactattttttttttgaaaattatgttttggcggaaagttctttaaaaaagttaatcaaaatttttggcgctttagtcaaattaattttctggcaaaaatattagtaattttggcgtgagttcaattttcccattcttaaaatttcacacaattaagaattttaagatttgggtttttttttcaacaaaaaatcaaatatttacatgaaaattcggcgggaaataaaaaaaaatattccgattcaatgtgtgaataactttttgcggggaattcaaatttgcattatttaaactttttttaagctcgaaaaattgaaattcttaaataaataaataaaattttcctcgaattttgaatgtttcgattttttagcgttattttttcaaaatttccactaaaactctagttctaaagttctaaaactttaaaaacttcctaatgttgtggtcttgtgtttttttggcagcgatttccaaatttctgaaattccaacaaaaaaaccactacgtcagtttgcatatccaacccccccccccccccccccccctctgagccaatcaatcatgtgcattttgaattggcgccaaggcaatcttcgtaaaaaataacaatagagtcatccctcagaacagaaaagaaacccgcccgggggctcaaatacacatgtcatttttcttttttcgcctgatttttagcctaaattagtgtttagcaattttttaaggtaactcggtggagtcatttgaactttttaaactaaaatttcagaaaaaattctttttttttgtcaaaaaataattttcccgccggaatttttcaaaaaaataatttttattttatttttcaagttccttgtttcctctttatttttttattttgcccccaaaagttttacactaaaatatttaattttcaggtaattcatcgaaagtctttctattttccgcatctcttgttcaaaatagtaacctactaaaacaaggtgagcctaattttttttaaatactgtatttccaaaaagtagtcataagatatattatgaaaattttcaagaatcttcgtacaatattttggcagaaaatttgaattttgaaattttttggtaaattttcctggaatatttgaaattaatttttggcgccagtttcaaaacataaaatttagaattttttttaagttttgaaaaaaatttttcaacaaattttggcggtaatttgtgaatttctttttttttaaacatatttcgaaaaaattattttgacataattttttcaataaaaaaatttgcacaaagtttaaaataagttgttcaaaaaattttctagaatctcgatttaaaaaatttctgacgaatatgccgcaaacttacatattagaaaaaaaattggcgggaaataaaagaacacagaatttttcataaaattttaaataatttggcgcaaagtctaaaaattgttctgaaaaagatgttttttcgacaaaattcgaatttatcaattttctaaaaaaatatttccaaagaaagagtttagcgcgaatttgaaatttttgaaaaagtgacagttgtcatactcaattatttgcaaaaaatttttaaataagacaattggcgcgaagttcaaaaattccagaaaaaattttgcgcaaaagtcaaaattttgagagtttttggcgcgaaattcatatttttcaaaaaaaaattggcgggctatacaaaaattcaaaaaaattcggcaaaaaatacaaaatttttaacatgttcaacaactaaaccaccaagaagttcctctttaaaaaaatttccaaaaattacaaactcctcctgtattacctgtatttccactacctttcttatattaattttctcaattttctcctgtatttctctgtctctcccctccccaacaagccttatacgtgtgtttttcctcaaaactgggcgtggtctcggcggccctctggcgatctgtgtctcccctaagtctctctctcccccatacaatgggtctcacggctctgttacgcgccgagccacgtcataagttttctttaaatttttttttgtttgagaaaaagcccctaggccagcccgaagcccaaaaaatttagaaaaaataaaatattccagggggagagagagag | pOH596 | *otEx6978, otEx6979* | | This paper |
| *unc-17prom4::gfp* | pOH176 | tctagaatctcgatttaaaaaatttctgacgaatatgccgcaaacttacatattagaaaaaaaattggcgggaaataaaagaacacagaatttttcataaaattttaaataatttggcgcaaagtctaaaaattgttctgaaaaagatgttttttcgacaaaattcgaatttatcaattttctaaaaaaatatttccaaagaaagagtttagcgcgaatttgaaatttttgaaaaagtgacagttgtcatactcaattatttgcaaaaaatttttaaataagacaattggcgcgaagttcaaaaattccagaaaaaattttgcgcaaaagtcaaaattttgagagtttttggcgcgaaattcatatttttcaaaaaaaaattggcgggctatacaaaaattcaaaaaaattcggcaaaaaatacaaaatttttaacatgttcaacaactaaaccaccaagaagttcctctttaaaaaaatttccaaaaattacaaactcctcctgtattacctgtatttccactacctttcttatattaattttctcaattttctcctgtatttctctgtctctcccctccccaacaagccttatacgtgtgtttttcctcaaaactgggcgtggtctcggcggccctctggcgatctgtgtctcccctaagtctctctctcccccatacaatgggtctcacggctctgttacgcgccgagccacgtcataagttttctttaaatttttttttgtttgagaaaaagcccctaggccagcccgaagcccaaaaaatttagaaaaaataaaatattccagggggagagagagag | pPD95.75 | *otIs660*  *otIs661* | | Wenick et al. 2004  (promoter D) |
| *unc-17prom5::gfp* | na | gtatacaccaatcatttctcccctccgaaatgtgtagtcgtcatgacaaagtggtgacactggattacggtaggctccgcccacttcttggaaaagtgacgtgggctcggtgagccctaaagcttttggttttcacaattttctggtttttgggatttttgcgggaattttgagaggagaaagttgggagagaagatattggaatggtccccggggagctgtacatttatacatctagactgaagctggggtattgcaaaaagagaaaagcctatcactttctttccatcctgcatacttgccaaaaagttttggctgagcttatttttaaaattggaattttttggaattttcagaaaagaaaaagttttttctttttttttaatttaaaaaatttttgctatttattgcatggtactacagaaaaacttgaatgaaataaaaaatttggaaaattcaagaaaactttttttttcatagtttatttattcgagttttaatgtggcttttattttgttcggtttttgttttaaaaagattttatacaaaatttcaagaatttacaatttttccgttgtaaaaaatccaaaaaaaaatccaaaaaaatagttcagacctttttttaaattttaaatttaaaaattcaataccaaaaaattaaaaaaaattagtttttccgagaataaaggaaaaatgttgaaaaaatattatatataaaatttccagaaaatgtgaaaactccaaaaaactgcagacttttccccaaactagctattttttgaattcattacctttaaaggtggagtaccgaaatttaagactttgcttttttagacccaaaatggtccaaaactaccaaatttcgtaatgagacgttctgaaaatttttcaaaaaaatgttatgggagctcaaagtttttgaaaaaatggtatatttttagctaattttaaccacttcttggcgtcgcagcggttggaactcaattttaattaaattatcatccttcaatgtccttcaatctttgcaatttcaatcgaccatacgcgttcagagcatttttttttttcgtttttcctcccgtccagcacatatttaaatattctctctccccctcccctggttcctaaaaacttgggaaaggggaatttcgaaggaggtggaagcttcttcttctccccgagcacacacacacatcctctcttcaaaatctttaagaaatagtgcgtgtgaatgactagacgctgaagctaacttggtttccgcgaacaatcccaatcagtgcctgtgccgaggcttcggagaagaagagattgacgtcgtctttttctttttttgtgaaacagaataaaaaagaatacgaaatggactttttcacacattttcgttacttttccagaaaaaaacgaagctctagccatggaagtttgaattgaaaacctaaaccccgatgtgtattcatttgagcttaagcctaagcctaattctacgcctaagcataagcctaagcctatgttcaagcctaagccaaattgtagaacgttaccaaaagatcaaacctatttttcctacagaaaaggtctaatgataactgttaagcgagagacaaggagagatatatatcaaaaactagcccaaactgtgattaacatctattaactgacctcaaaaaaaaaaatagtagagattaaatactgctcaaaaagtttcttggaaaagtaaattgttaggtttctggggcctgtaaaactggaccgagttttgaagaatttttttaacttttcaaagtttggcgtcactgaaagctttatattgtacatgttccaccaattttcttttgtatccgttttttctgtctcaaaacggagctcgagcccatgacgtgtggataccgtgagaatccgcccaattccttcacatcgatctcatatttctttcccagtttatattgaattcccgttgaattgcggctttgcaggggagaagatgtgcgtctttatatttttttttctatccttacccgccgtgaatccggctcgaattgagccaatttttatgaatagtagagctaattgacttcgtctccctagaattgatgaggtaaagctcgtggggagatatggagatttttcgattttttttccagtaattttcagttcaaaatttgagcttttgagcaggagttttgagatttgtgccaaaatttcctattattttttcaaatatttttgcttttgtaaaaaaggtgtagtagaagttttgtagtgccactattttttttttgaaaattatgttttggcggaaagttctttaaaaaagttaatcaaaatttttggcgctttagtcaaattaattttctggcaaaaatattagtaattttggcgtgagttcaattttcccattcttaaaatttcacacaattaagaattttaagatttgggtttttttttcaacaaaaaatcaaatatttacatgaaaattcggcgggaaataaaaaaaaatattccgattcaatgtgtgaataactttttgcggggaattcaaatttgcattatttaaactttttttaagctcgaaaaattgaaattcttaaataaataaataaaattttcctcgaattttgaatgtttcgattttttagcgttattttttcaaaatttccactaaaactctagttctaaagttctaaaactttaaaaacttcctaatgttgtggtcttgtgtttttttggcagcgatttccaaatttctgaaattccaacaaaaaaaccactacgtcagtttgcatatccaacccccccccccccccccccccctctgagccaatcaatcatgtgcattttgaattggcgccaaggcaatcttcgtaaaaaataacaatagagtcatccctcagaacagaaaagaaacccgcccgggggctcaaatacacatgtcatttttcttttttcgcctgatttttagcctaaattagtgtttagcaattttttaaggtaactcggtggagtcatttgaactttttaaactaaaatttcagaaaaaattctttttttttgtcaaaaaataattttcccgccggaatttttcaaaaaaataatttttattttatttttcaagttccttgtttcctctttatttttttattttgcccccaaaagttttacactaaaatatttaattttcaggtaattcatcgaaagtctttctattttccgcatctcttgttcaaaatagtaacctactaaaacaag |  | *vsIs48* | | Chase et al., 2004 |
| *unc-17*  *prom6::2xnls::DsRed2* |  | gtgacactggattacggtaggctccgcccacttcttggaaaagtgacgtgggctcggtgagccctaaagcttttggttttcacaattttctggtttttgggatttttgcgggaattttgagaggagaaagttgggagagaagatattggaatggtccccggggagctgtacatttatacatctagactgaagctggggtattgcaaaaagagaaaagcctatcactttctttccatcctgcatacttgccaaaaagttttggctgagcttatttttaaaattggaattttttggaattttcagaaaagaaaaagttttttctttttttttaatttaaaaaatttttgctatttattgcatggtactacagaaaaacttgaatgaaataaaaaatttggaaaattcaagaaaactttttttttcatagtttatttattcgagttttaatgtggcttttattttgttcggtttttgttttaaaaagattttatacaaaatttcaagaatttacaatttttccgttgtaaaaaatccaaaaaaaaatccaaaaaaatagttcagacctttttttaaattttaaatttaaaaattcaataccaaaaaattaaaaaaaattagtttttccgagaataaaggaaaaatgttgaaaaaatattatatataaaatttccagaaaatgtgaaaactccaaaaaactgcagacttttccccaaactagctattttttgaattcattacctttaaaggtggagtaccgaaatttaagactttgcttttttagacccaaaatggtccaaaactaccaaatttcgtaatgagacgttctgaaaatttttcaaaaaaatgttatgggagctcaaagtttttgaaaaaatggtatatttttagctaattttaaccacttcttggcgtcgcagcggttggaactcaattttaattaaattatcatccttcaatgtccttcaatctttgcaatttcaatcgaccatacgcgttcagag | PCR fusion | *otEx4750* | | Kratsios et al., 2011 |
| *unc-17*  *prom7::tagrfp* | pOH620 | gcatggtactacagaaaaacttgaatgaaataaaaaatttggaaaattcaagaaaactttttttttcatagtttatttattcgagttttaatgtggcttttattttgttcggtttttgttttaaaaagattttatacaaaatttcaagaatttacaatttttccgttgtaaaaaatccaaaaaaaaatccaaaaaaatagttcagacctttttttaaattttaaatttaaaaattcaataccaaaaaattaaaaaaaattagtttttccgagaataaaggaaaaatgttgaaaaaatattatatataaaatttccagaaaatgtgaaaactccaaaaaactgcagacttttccccaaactagctattttttgaattcattacctttaaaggtggagtaccgaaatttaagactttgcttttttagacccaaaatggtccaaaactaccaaatttcgtaatgagacgttctgaaaatttttcaaaaaaatgttatgggagctcaaagtttttgaaaaaatggtatatttttagctaattttaaccacttcttggcgtcgcagcggttggaactcaattttaattaaattatcatccttcaatgtccttcaatctttgcaatttcaatcgaccatacgcgttcagagcatttttttttttcgtttttcctcccgtccagcacatatttaaatattctctctccccctcccctggttcctaaaaacttgggaaaggggaatttcgaaggaggtggaagcttcttcttctccccgagcacacacacacatcctctcttcaaaatctttaagaaatagtgcgtgtgaatgactagacgctctgtgccgaggcttcggagaagaagagattgacgtcgtctttttctttttttgtgaaacagaataaaaaagaatacgaaatggactttttcacacattttcgttacttttccagaaaaaaacgaagctctagccatgga | pOH596 | *otEx6982, otEx6983* | | This paper |
| *unc-17*  *prom8::tagrfp* | pOH621 | ctctagccatggaagtttgaattgaaaacctaaaccccgatgtgtattcatttgagcttaagcctaagcctaattctacgcctaagcataagcctaagcctatgttcaagcctaagccaaattgtagaacgttaccaaaagatcaaacctatttttcctacagaaaaggtctaatgataactgttaagcgagagacaaggagagatatatatcaaaaactagcccaaactgtgattaacatctattaactgacctcaaaaaaaaaaatagtagagattaaatactgctcaaaaagtttcttggaaaagtaaattgttaggtttctggggcctgtaaaactggaccgagttttgaagaatttttttaacttttcaaagtttggcgtcactgaaagctttatattgtacatgttccaccaattttcttttgtatccgttttttctgtctcaaaacggagctcgagcccatgacgtgtggataccgtgagaatccgcccaattccttcacatcgatctcatatttctttcccagtttatattgaattcccgttgaattgcggctttgcaggggagaagatgtgcgtctttatatttttttttctatccttacccgccgtgaatccggctcgaattgagccaatttttatgaatagtagagctaattgacttcgtctccctagaattgatgaggtaaagctcgtggggagatatggagatttttcgattttttttccagtaattttcagttcaaaatttgagcttttgagcaggagttttgagatttgtgccaaaatttcctattattttttcaaatatttttgcttttgtaaaaaaggtgtagtagaagttttgtagtgccactattttt | pOH596 | *otEx6984, otEx6985* | | This paper |
| *unc-17*  *prom8_B30::tagrfp* | pOH622 | ctctagccatggaagtttgaattgaaaacctaaaccccgatgtgtattcatttgagcttaagcctaagcctaattctacgcctaagcataagcctaagcctatgttcaagcctaagccaaattgtagaacgttaccaaaagatcaaacctatttttcctacagaaaaggtctaatgataactgttaagcgagagacaaggagagatatatatcaaaaactagcccaaactgtgattaacatctattaactgacctcaaaaaaaaaaatagtagagattaaatactgctcaaaaagtttcttggaaaagtaaattgttaggtttctggggcctgtaaaactggaccgagttttgaagaatttttttaacttttcaaagtttggcgtcactgaaagctttatattgtacatgttccaccaattttcttttgtatccgttttttctgtctcaaaacggagctcgagcccatgacgtgtggataccgtgagaatccgcccaattccttcacatcgatctcatatttctttcccagtttatattgaattcccgttgaattgcggctttgcaggggagaagatgtgcgtctttatatttttttttctatccttacccgccgtgaatccggctcgaattgagccaatttttatgaatagtagagctaattgacttcgtctccctagaattgatgaggtaaagctcgtggggagatatggagatttttcgattttttttccagtaattttcagttcaaaatttgagcttttgagcaggagttttgagatttgtgccaaaatttcctattattttttcaaatatttttgcttttgtaaaaaaggtgtagtagaagttttgtagtgccactattttt | pOH596 | *otEx6990, otEx6991* | | This paper |
| *unc-17*  *prom9::tagrfp* | pOH623 | tttttgaaaattatgttttggcggaaagttctttaaaaaagttaatcaaaatttttggcgctttagtcaaattaattttctggcaaaaatattagtaattttggcgtgagttcaattttcccattcttaaaatttcacacaattaagaattttaagatttgggtttttttttcaacaaaaaatcaaatatttacatgaaaattcggcgggaaataaaaaaaaatattccgattcaatgtgtgaataactttttgcggggaattcaaatttgcattatttaaactttttttaagctcgaaaaattgaaattcttaaataaataaataaaattttcctcgaattttgaatgtttcgattttttagcgttattttttcaaaatttccactaaaactctagttctaaagttctaaaactttaaaaacttcctaatgttgtggtcttgtgtttttttggcagcgatttccaaatttctgaaattccaacaaaaaaaccactacgtcagtttgcatatccaacccccccccccccccccccccctctgagccaatcaatcatgtgcattttgaattggcgccaaggcaatcttcgtaaaaaataacaatagagtcatccctcagaacagaaaagaaacccgcccgggggctcaaatacacatgtcatttttcttttttcgcctgatttttagcctaaattagtgtttagcaattttttaaggtaactcggtggagtcatttgaactttttaaactaaaatttcagaaaaaattctttttttttgtcaaaaaataattttcccgccggaatttttcaaaaaaataatttttattttatttttcaagttccttgtttcctctttatttttttattttgcccccaaaagttttacactaaaatatttaattttcaggtaattcatcgaaagtctttctattttccgcatctcttgttcaaaatagtaacctactaaaacaaggtgagcc | pOH596 | *otEx6986, otEx6987* | | This paper |
| *unc-17*  *prom9_C39::tagrfp* | pOH624 | tttttgaaaattatgttttggcggaaagttctttaaaaaagttaatcaaaatttttggcgctttagtcaaattaattttctggcaaaaatattagtaattttggcgtgagttcaattttcccattcttaaaatttcacacaattaagaattttaagatttgggtttttttttcaacaaaaaatcaaatatttacatgaaaattcggcgggaaataaaaaaaaatattccgattcaatgtgtgaataactttttgcggggaattcaaatttgcattatttaaactttttttaagctcgaaaaattgaaattcttaaataaataaataaaattttcctcgaattttgaatgtttcgattttttagcgttattttttcaaaatttccactaaaactctagttctaaagttctaaaactttaaaaacttcctaatgttgtggtcttgtgtttttttggcagcgatttccaaatttctgaaattccaacaaaaaaaccactacgtcagtttgcatatccaacccccccccccccccccccccctctgagccaatcaatcatgtgcattttgaattggcgccaaggcaatcttcgtaaaaaataacaatagagtcatccctcagaacagaaaagaaacccgcccgggggctcaaatacacatgtcatttttcttttttcgcctgatttttagcctaaattagtgtttagcaattttttaaggtaactcggtggagtcatttgaactttttaaactaaaatttcagaaaaaattctttttttttgtcaaaaaataattttcccgccggaatttttcaaaaaaataatttttattttatttttcaagttccttgtttcctctttatttttttattttgcccccaaaagttttacactaaaatatttaattttcaggtaattcatcgaaagtctttctattttccgcatctcttgttcaaaatagtaacctactaaaacaaggtgagcc | pOH596 | *otEx6992, otEx6993* | | This paper |
| *unc-17*  *prom10::tagrfp* | pOH625 | gatttttcatcattgattagtgattatcggttttttgtttgatttttgatttttgattattgattttaaatgttcgtcggtagagcggttttcgatagctaaaagtggctgttggtaatcaaccaataatcaattattgactaccggctaccagctaccggctatcggccaccggctacaatagtcaattattgattatcggctagcggcattgaaaagtcgataaccggtttttagcaatcgacagtcaaaaaccgattatcaaagttggaaaattgaaaatcttagctatcagtcgatagcaatgaaaaatcaataatcaatttccaattcaggaaaaaaatttgaactcctttttcgacaaccggtagcaaatcccccccccccccccccccccccccactccccgcgtcactttctcaagtaggtgttggcgcttcgaattcgagacatccctaattacaggggtggctcctcagctctccgttggctcagctctctagaaatccccctttctaaccaattattagaaaagcataagcatacgaatttcgccttttcctcttctttcttttttatcccatgattttgtagtggaaagcgctctggcttcaaaaaataaaattgaagtcgtgggtacggagtctctcaatatcagtgagcgcgagctcatgatttattcgtatcacttgctcgtggagctcgagattttctgaattttctcacaggctccgataagttttcgccatttttttcttgatttttctttcagaaagagaaaaacatagtaatctagtaatggtatctccagactagttgggaattccagaaaaaaatttgtaccatataataattttaaaggtattaggcaccaatttttcaagtctagcattaggaaaattttaatttcacaatttttgaaatttaagaaaaaacattttacatctaacttttttaagcaaaaaattaggtatactgaacttttctataaaaaatattgag | pOH596 | *otEx6994, otEx6995* | | This paper |
| *unc-17_250bp::yfp* | pOH626 | gtgacactggattacggtaggctccgcccacttcttggaaaagtgacgtgggctcggtgagccctaaagcttttggttttcacaattttctggtttttgggatttttgcgggaattttgagaggagaaagttgggagagaagatattggaatggtccccggggagctgtacatttatacatctagactgaagctggggtattgcaaaaagagaaaagcctatcactttctttccatcctgcatacttgcc |  | *otEx5136, otEx5137* | | This paper |
| *unc-17_200bp::yfp* | pOH627 | gtgacactggattacggtaggctccgcccacttcttggaaaagtgacgtgggctcggtgagccctaaagcttttggttttcacaattttctggtttttgggatttttgcgggaattttgagaggagaaagttgggagagaagatattggaatggtccccggggagctgtacatttatacatctagactgaagctggggta | pPD95-67 | *otEx5138, otEx5139* | | This paper |
| *unc-17_150bp::yfp* | na | ggctcggtgagccctaaagcttttggttttcacaattttctggtttttgggatttttgcgggaattttgagaggagaaagttgggagagaagatattggaatggtccccggggagctgtacatttatacatctagactgaagctggggta | (PCR-amplified from pOH627) | *otEx5198, otEx5199* | | This paper |
| *unc-17_125bp::yfp* | na | gttttcacaattttctggtttttgggatttttgcgggaattttgagaggagaaagttgggagagaagatattggaatggtccccggggagctgtacatttatacatctagactgaagctggggta | (PCR-amplified from pOH627) | *otEx5308, otEx5309* | | This paper |
| *unc-17*  *_250bp_A47_B30*  *::yfp* | pOH628 | gtgacactggattacggtaggctccgcccacttcttggaaaagtgacgtgggctcggtgagccctaaagcttttggttttcacaattttctggtttttggggaatggtccccggggagctgtattgcaaaaagagaaaagcctatcactttctttccatcctgcatacttgcc | pPD95-67 | *otEx5610, otEx5611* | | This paper |
| *unc-17*  *_250bp_C72_B30*  *::yfp* | pOH629 | gtgacactggattacggtaggctccgcccacttcttggaaaagtgacgtgggctcggtgagccctaaagcttttgggaatggtccccggggagctgtattgcaaaaagagaaaagcctatcactttctttccatcctgcatacttgcc | pPD95-67 | *otEx5612, otEx5613* | | This paper |
|  | | | | | | |
| *cho-1*  *prom1_5160bp::nls::tagrfp* | na | gagctctttgcgggagggggtgagcctcggtgtgccagaagtagtgtagaatagaggaagagagcgccaaaaaactcgaatgatgtatacacgagaagctgctcttcctgctcctcttctaccatcacaacgacacaaaaacggtctccagggagagaaatgagaagagggaggataggggaaactccaaaaagacttgaagcctccagtctctcgagcggacacacacaatttgttcacgcctttcacgttttcttggtgtcatgttttttgttcatgtatttcaaaataacggtttttttccgtttttaattttgggtcttaccgcgaatttctaagaggcggctaactttatgtgttcatgagttgtttgaaatatcaatttggcacagcaattactctaatacatgctttaaaatgggcgggctactactgtccattttgtgggcggggtttgatttgttccgctcatttttagcgctgcggtaagagctttcagtaaaatcaattttaacttttcattaaacattttaggccggaaatttgaattttttttgtgggtcaggaaacctacgtggccgcgttaacagtctgtcactttcaaaatatatttattattagatttgcaactttttttttttgaaaacccctccacaaaacagtagataacccttttcagaacaacttggtcaaatttgcctactaggcacaaaccaactcctacgtacctgcctataatacaatcttctatgtgtaaaatatggcacacatgcgactttgaaacccagtttcattacaacctgtagagaatagtagagaaaaggcaggcagatgaatcttttttaaattttattttaggacaaaatgttgaaggtaaaaatctagcttcaaaatgacctacaaataggccccacccatatcttggttttactgaattttttatcaaaagttttccagtgttgatcggtattttttgaagaccttccacgtaggcattgcctgcgtgcatgcctacgcctacctcgtgtatacctcgtggcaggcaggtaaggcgttttcagcccgagcgttgtggaagcccccctggaaaacctcaatatgatcaaccaccacacagctgatgtgtgggggaccaccttcattgaggcggcctgaatctatttaggaaatctaaatgaaatcttcttcacatctatctaattatcctcctctctcccactcttcccattcaatttttttcgaaaaaatagatcgtgacgacgcgagaatctgagctcaaaaacacgagcagtaggcacccatcaatttctccacccctccgctgctctcaactctgaaattagagccttcaccacggctccattcttcttctcgcgcgccttgattgacgattatctcgacatttccgtcagtcagggcttttcactctttccgcttcgaaaagtcgtgtgcttcttcttcttcttgctccgccgctgctccgaattggttacggaaacttgaactttcttcgatgttttcttcttcgtcgtagtcttcccagtgacgtcgtcttcttttctttttcttattgcttgtgctgctcaccaccaaaatcattgcaaattcaattgagaactcgcggcggcgatgtctccaagtgttcgaaacagacaaaaaactaaataaaagaaaaagaagaagcatgacatgttgcctttaaattcttcctcaatttttcttcaaacttccacccccacagtggcaaaaaaccacatttgctccgtggccgcgtgacaaaaattgatggctgagttttcatctctcgcggccacgtaggatactagaaagaagagtgccctctagaaaactcggccacgggtgcgcggaatttcaaatttcctctgggtttttgaagattccgagcaactttcgttttagtctaggtccgagaaaattcgcggccgccaattttttacggccatgtaggaaaaaattcattttaggagcattgaatgatattgtaggtcctaccgaatttctaaagcgattaccgtacccgtttaaaggcgcatgccacttttcaccacccttcacgacctataaatttattttcgatagttgcaaaaaaagcgaagaaaacaagaaacgcttgacaaaacatttccgcagttgcaaatcctttcttaaaacttgtttgattggctcaatccgttgctcttttgctcatcctcctctctttcccatacacacacatcgaaatatgaatcttctcttaaaaagaaggttgtccaattagtttcccctattcatttttccatgttttcttataacaactttttcttttgaatactcctccagaaatgataaatctttgtgagatgccaattaaaatttatttttgaattttatttgttgaaggattttatttgttgaatgacctaaatagaggctccgcccatatcttggctttctgcaatttgcataaaaggttttccagttttcgtaggtattttttgaaggtcttccacgtaggcgttgccggcgtgcctacgcataccttctgcatattgccaaagtacttctgaatcctttcttccaactatttgattgaatagagaaaaccgaggaactacactaggtaggcaggcaggtcgacaggcagtggctaccttagctgaccagtgaattttttttcaaatcgtgttattgagacacttgtgcagaagtttaaagtgcacagttttaaaatattaggcgtcttgttcaaatttgaattttaatgcctaaatagataggtaggtaggtaggcagcacggtaggcaagaagtaagataggtaggaaggtatgttagtaactattttataaactatatacgttatcgaaaggatctaaaatttttctttggggttcaaaaaaggtcctagttttttgcaataaaaaaaacacaatcaacgccaacgctctagctaggtaggcaagccggtaggtaggcacgcagataaattggctagtaggtaggtaggtaggtaggtgggtaggtaggtaggtaagtaggtatatagctataggtaagtgagtaagtaagctgtatttttgtggttctgagagcttactacaattttttctgaaaattcgtattattttttaaaataaaaaaagctatcaaccctcttctaaggtttcaaaaatgaaatcattctcagcgctcccttttgtaatcagatatccttcgaaaaaaagaataccgtcaatcttcttaaatttcctcaaatttcaagccttttctggaaccccggttccaaatttctgacggcttcttacaaaagcatatgcacaaatcttttgctcgtaaatcatgtgcattcgaaatgatgaggtgggccctttcggggtgagaccggtctcttagcattccgcccccaatttttccaaactttttctgccattcactcaaatatccattcaattttcgtttgaaaataaactttttttttcattcattcaatttcaatttagcatagaacttcgaggagtcatttgttgtataattgaattcctttatcaagattagtgaggtggagcacggggcacgtcatttcagtaatccaggtcactgttacccttatttttccattaagtgttctgtgcgaattgaaaaatgttagaatcaggaatattgtggccaagatgtttgcggagactagttatctgaaaacatttcagtccctagtaaaatgaagttatcaccttcagaatgttaggctgattacttcttcaacttttgcctttttctaattttaagctccgcccacttcttggctgtttttttttgagttaacctcgcccatttatcacaatgttgtatatttcaactccgcccacttatcgggattttttgcatttgtaactccacccgtttcttggtgcttgttttttgcactgtgagctcctcccaattattgatagtttagatttaggctccgcccctttctttactgtttttcgcgttatgcccagccacaaatctataattttacagttttagctccgcttgaatgctttcctatcagtaaaattctcggtgtttttacattcgatctctagaattttcggaaattttttggtgttggaaggcgtgacgtcacacgagagctagtgtttagaagaacactaatgacgtcaccctaataattttcagaatttttttatctaaataaaaatggatccggtcctaaactatcttgctagtaattgtttgaaaagttgaaaattttcagaattttaacaaatttgttgtaatttcgaacataaattatgttgatcgagatatcaacttgaattttttttttaatacgtacatgtgcactcaacttcaactctaaaaataaaaaaacactatttctatattctagatctctttagtgatgtaataataagaatttccaagctatacacctagccaccgcctactcacctcattcagtttcccacgaagaattagaagaaaatgaagaaaaatggaattgaatagagtcagtgtgagtgtgtgaaatgaaaaaaaaatatatatcgatgtggcggtatctcggataaataattaactatttctcagtttttacttattctcagactctccttttttgcttttgaatatctcttcttcgtcgtcatcattgagatttttcttctaataatcgtaactttgtaattaaaagaacattcatttcgggtcttgcggcgaaaaatacatttaaaggtccacgggttcattagtatgggtctcactgcgagaaaaagtttatagtttgtatttagtattcacattgtttttgaaaataaattgaaatcgataaaaactaatcaatttgaaaaaaaatatttaaaaattctaccacaattaaatttttaaacttaatttaaaaaagaactacagcgtaatttttaaagttagaactacagagaactgtttctcgtacactcaaaatattgaaactgctttgtgtgtacatccaaataggccccgcctttttctcgttcactcacggggaaaaggcaaaaatcttgaccccaaccaatatcaggccgccgacatcttgcgagttcctctatcttatccaattttcgtctacttttcttttcgattttcacatttccaattttaattttccaggacaaat | PCR fusion | | *otEx4529* | Kratsios et al., 2011 |
| *cho-1*  *prom2::nls::tagrfp* | pOH630 | tctttccgcttcgaaaagtcgtgtgcttcttcttcttcttgctccgccgctgctccgaattggttacggaaacttgaactttcttcgatgttttcttcttcgtcgtagtcttcccagtgacgtcgtcttcttttctttttcttattgcttgtgctgctcaccaccaaaatcattgcaaattcaattgagaactcgcggcggcgatgtctccaagtgttcgaaacagacaaaaaactaaataaaagaaaaagaagaagcatgacatgttgcctttaaattcttcctcaatttttcttcaaacttccacccccacagtggcaaaaaaccacatttgctccgtggccgcgtgacaaaaattgatggctgagttttcatctctcgcggccacgtaggatactagaaagaagagtgccctctagaaaactcggccacgggtgcgcggaatttcaaatttcctctgggtttttgaagattccgagcaactttcgttttagtctaggtccgagaaaattcgcggccgccaattttttacggccatgtaggaaaaaattcattttaggagcattgaatgatattgtaggtcctaccgaatttctaaagcgattaccgtacccgtttaaaggcgcatgccacttttcaccacccttcacgacctataaatttattttcgatagttgcaaaaaaagcgaagaaaacaagaaacgcttgacaaaacatttccgcagttgcaaatcctttcttaaaacttgtttgattggctcaatccgttgctcttttgctcatcctcctctctttcccatacacacacatcgaaatatgaatcttctcttaaaaagaaggttgtccaattagtttcccctattcatttttccatgttttcttataacaactttttcttttgaatactcctccagaaatgataaatctttgtgagatgccaattaaaatttatttttgaattttatttgttgaaggattttatttgttgaatgacctaaatagaggctccgcccatatcttggctttctgcaatttgcataaaaggttttccagttttcgtaggtattttttgaaggtcttccacgtaggcgttgccggcgtgcctacgcataccttctgcatattgccaaagtacttctgaatcctttcttccaactatttgattgaatagagaaaaccgaggaactacactaggtaggcaggcaggtcgacaggcagtggctaccttagctgaccagtgaattttttttcaaatcgtgttattgagacacttgtgcagaagtttaaagtgcacagttttaaaatattaggcgtcttgttcaaatttgaattttaatgcctaaatagataggtaggtaggtaggcagcacggtaggcaagaagtaagataggtaggaaggtatgttagtaactattttataaactatatacgttatcgaaaggatctaaaatttttctttggggttcaaaaaaggtcctagttttttgcaataaaaaaaacacaatcaacgccaacgctctagctaggtaggcaagccggtaggtaggcacgcagataaattggctagtaggtaggtaggtaggtaggtgggtaggtaggtaggtaagtaggtatatagctataggtaagtgagtaagtaagctgtatttttgtggttctgagagcttactacaattttttctgaaaattcgtattattttttaaaataaaaaaagctatcaaccctcttctaaggtttcaaaaatgaaatcattctcagcgctcccttttgtaatcagatatccttcgaaaaaaagaataccgtcaatcttcttaaatttcctcaaatttcaagccttttctggaaccccggttccaaatttctgacggcttcttacaaaagcatatgcacaaatcttttgctcgtaaatcatgtgcattcgaaatgatgaggtgggccctttcggggtgagaccggtctcttagcattccgcccccaatttttccaaactttttctgccattcactcaaatatccattcaattttcgtttgaaaataaactttttttttcattcattcaatttcaatttagcatagaacttcgaggagtcatttgttgtataattgaattcctttatcaagattagtgaggtggagcacggggcacgtcatttcagtaatccaggtcactgttacccttatttttccattaagtgttctgtgcgaattgaaaaatgttagaatcaggaatattgtggccaagatgtttgcggagactagttatctgaaaacatttcagtccctagtaaaatgaagttatcaccttcagaatgttaggctgattacttcttcaacttttgcctttttctaattttaagctccgcccacttcttggctgtttttttttgagttaacctcgcccatttatcacaatgttgtatatttcaactccgcccacttatcgggattttttgcatttgtaactccacccgtttcttggtgcttgttttttgcactgtgagctcctcccaattattgatagtttagatttaggctccgcccctttctttactgtttttcgcgttatgcccagccacaaatctataattttacagttttagctccgcttgaatgctttcctatcagtaaaattctcggtgtttttacattcgatctctagaattttcggaaattttttggtgttggaaggcgtgacgtcacacgagagctagtgtttagaagaacactaatgacgtcaccctaataattttcagaatttttttatctaaataaaaatggatccggtcctaaactatcttgctagtaattgtttgaaaagttgaaaattttcagaattttaacaaatttgttgtaatttcgaacataaattatgttgatcgagatatcaacttgaattttttttttaatacgtacatgtgcactcaacttcaactctaaaaataaaaaaacactatttctatattctagatctctttagtgatgtaataataagaatttccaagctatacacctagccaccgcctactcacctcattcagtttcccacgaagaattagaagaaaatgaagaaaaatggaattgaatagagtcagtgtgagtgtgtgaaatgaaaaaaaaatatatatcgatgtggcggtatctcggataaataattaactatttctcagtttttacttattctcagactctccttttttgcttttgaatatctcttcttcgtcgtcatcattgagatttttcttctaataatcgtaactttgtaattaaaagaacattcatttcgggtcttgcggcgaaaaatacatttaaaggtccacgggttcattagtatgggtctcactgcgagaaaaagtttatagtttgtatttagtattcacattgtttttgaaaataaattgaaatcgataaaaactaatcaatttgaaaaaaaatatttaaaaattctaccacaattaaatttttaaacttaatttaaaaaagaactacagcgtaatttttaaagttagaactacagagaactgtttctcgtacactcaaaatattgaaactgctttgtgtgtacatccaaataggccccgcctttttctcgttcactcacggggaaaaggcaaaaatcttgaccccaaccaatatcaggccgccgacatcttgcgagttcctctatcttatccaattttcgtctacttttcttttcgattttcacatttccaattttaattttccaggacaaat | pOH596 | | *otEx4535* | This paper |
| *cho-1*  *prom3::nls::tagrfp* | pOH631 | ttctgcaatttgcataaaaggttttccagttttcgtaggtattttttgaaggtcttccacgtaggcgttgccggcgtgcctacgcataccttctgcatattgccaaagtacttctgaatcctttcttccaactatttgattgaatagagaaaaccgaggaactacactaggtaggcaggcaggtcgacaggcagtggctaccttagctgaccagtgaattttttttcaaatcgtgttattgagacacttgtgcagaagtttaaagtgcacagttttaaaatattaggcgtcttgttcaaatttgaattttaatgcctaaatagataggtaggtaggtaggcagcacggtaggcaagaagtaagataggtaggaaggtatgttagtaactattttataaactatatacgttatcgaaaggatctaaaatttttctttggggttcaaaaaaggtcctagttttttgcaataaaaaaaacacaatcaacgccaacgctctagctaggtaggcaagccggtaggtaggcacgcagataaattggctagtaggtaggtaggtaggtaggtgggtaggtaggtaggtaagtaggtatatagctataggtaagtgagtaagtaagctgtatttttgtggttctgagagcttactacaattttttctgaaaattcgtattattttttaaaataaaaaaagctatcaaccctcttctaaggtttcaaaaatgaaatcattctcagcgctcccttttgtaatcagatatccttcgaaaaaaagaataccgtcaatcttcttaaatttcctcaaatttcaagccttttctggaaccccggttccaaatttctgacggcttcttacaaaagcatatgcacaaatcttttgctcgtaaatcatgtgcattcgaaatgatgaggtgggccctttcggggtgagaccggtctcttagcattccgcccccaatttttccaaactttttctgccattcactcaaatatccattcaattttcgtttgaaaataaactttttttttcattcattcaatttcaatttagcatagaacttcgaggagtcatttgttgtataattgaattcctttatcaagattagtgaggtggagcacggggcacgtcatttcagtaatccaggtcactgttacccttatttttccattaagtgttctgtgcgaattgaaaaatgttagaatcaggaatattgtggccaagatgtttgcggagactagttatctgaaaacatttcagtccctagtaaaatgaagttatcaccttcagaatgttaggctgattacttcttcaacttttgcctttttctaattttaagctccgcccacttcttggctgtttttttttgagttaacctcgcccatttatcacaatgttgtatatttcaactccgcccacttatcgggattttttgcatttgtaactccacccgtttcttggtgcttgttttttgcactgtgagctcctcccaattattgatagtttagatttaggctccgcccctttctttactgtttttcgcgttatgcccagccacaaatctataattttacagttttagctccgcttgaatgctttcctatcagtaaaattctcggtgtttttacattcgatctctagaattttcggaaattttttggtgttggaaggcgtgacgtcacacgagagctagtgtttagaagaacactaatgacgtcaccctaataattttcagaatttttttatctaaataaaaatggatccggtcctaaactatcttgctagtaattgtttgaaaagttgaaaattttcagaattttaacaaatttgttgtaatttcgaacataaattatgttgatcgagatatcaacttgaattttttttttaatacgtacatgtgcactcaacttcaactctaaaaataaaaaaacactatttctatattctagatctctttagtgatgtaataataagaatttccaagctatacacctagccaccgcctactcacctcattcagtttcccacgaagaattagaagaaaatgaagaaaaatggaattgaatagagtcagtgtgagtgtgtgaaatgaaaaaaaaatatatatcgatgtggcggtatctcggataaataattaactatttctcagtttttacttattctcagactctccttttttgcttttgaatatctcttcttcgtcgtcatcattgagatttttcttctaataatcgtaactttgtaattaaaagaacattcatttcgggtcttgcggcgaaaaatacatttaaaggtccacgggttcattagtatgggtctcactgcgagaaaaagtttatagtttgtatttagtattcacattgtttttgaaaataaattgaaatcgataaaaactaatcaatttgaaaaaaaatatttaaaaattctaccacaattaaatttttaaacttaatttaaaaaagaactacagcgtaatttttaaagttagaactacagagaactgtttctcgtacactcaaaatattgaaactgctttgtgtgtacatccaaataggccccgcctttttctcgttcactcacggggaaaaggcaaaaatcttgaccccaaccaatatcaggccgccgacatcttgcgagttcctctatcttatccaattttcgtctacttttcttttcgattttcacatttccaattttaattttccaggacaaat | pOH596 | | *otEx4530* | This paper |
| *cho-1 prom4::nls::tagrfp* | pOH632 | ccagtgaattttttttcaaatcgtgttattgagacacttgtgcagaagtttaaagtgcacagttttaaaatattaggcgtcttgttcaaatttgaattttaatgcctaaatagataggtaggtaggtaggcagcacggtaggcaagaagtaagataggtaggaaggtatgttagtaactattttataaactatatacgttatcgaaaggatctaaaatttttctttggggttcaaaaaaggtcctagttttttgcaataaaaaaaacacaatcaacgccaacgctctagctaggtaggcaagccggtaggtaggcacgcagataaattggctagtaggtaggtaggtaggtaggtgggtaggtaggtaggtaagtaggtatatagctataggtaagtgagtaagtaagctgtatttttgtggttctgagagcttactacaattttttctgaaaattcgtattattttttaaaataaaaaaagctatcaaccctcttctaaggtttcaaaaatgaaatcattctcagcgctcccttttgtaatcagatatccttcgaaaaaaagaataccgtcaatcttcttaaatttcctcaaatttcaagccttttctggaaccccggttccaaatttctgacggcttcttacaaaagcatatgcacaaatcttttgctcgtaaatcatgtgcattcgaaatgatgaggtgggccctttcggggtgagaccggtctcttagcattccgcccccaatttttccaaactttttctgccattcactcaaatatccattcaattttcgtttgaaaataaactttttttttcattcattcaatttcaatttagcatagaacttcgaggagtcatttgttgtataattgaattcctttatcaagattagtgaggtggagcacggggcacgtcatttcagtaatccaggtcactgttacccttatttttccattaagtgttctgtgcgaattgaaaaatgttagaatcaggaatattgtggccaagatgtttgcggagactagttatctgaaaacatttcagtccctagtaaaatgaagttatcaccttcagaatgttaggctgattacttcttcaacttttgcctttttctaattttaagctccgcccacttcttggctgtttttttttgagttaacctcgcccatttatcacaatgttgtatatttcaactccgcccacttatcgggattttttgcatttgtaactccacccgtttcttggtgcttgttttttgcactgtgagctcctcccaattattgatagtttagatttaggctccgcccctttctttactgtttttcgcgttatgcccagccacaaatctataattttacagttttagctccgcttgaatgctttcctatcagtaaaattctcggtgtttttacattcgatctctagaattttcggaaattttttggtgttggaaggcgtgacgtcacacgagagctagtgtttagaagaacactaatgacgtcaccctaataattttcagaatttttttatctaaataaaaatggatccggtcctaaactatcttgctagtaattgtttgaaaagttgaaaattttcagaattttaacaaatttgttgtaatttcgaacataaattatgttgatcgagatatcaacttgaattttttttttaatacgtacatgtgcactcaacttcaactctaaaaataaaaaaacactatttctatattctagatctctttagtgatgtaataataagaatttccaagctatacacctagccaccgcctactcacctcattcagtttcccacgaagaattagaagaaaatgaagaaaaatggaattgaatagagtcagtgtgagtgtgtgaaatgaaaaaaaaatatatatcgatgtggcggtatctcggataaataattaactatttctcagtttttacttattctcagactctccttttttgcttttgaatatctcttcttcgtcgtcatcattgagatttttcttctaataatcgtaactttgtaattaaaagaacattcatttcgggtcttgcggcgaaaaatacatttaaaggtccacgggttcattagtatgggtctcactgcgagaaaaagtttatagtttgtatttagtattcacattgtttttgaaaataaattgaaatcgataaaaactaatcaatttgaaaaaaaatatttaaaaattctaccacaattaaatttttaaacttaatttaaaaaagaactacagcgtaatttttaaagttagaactacagagaactgtttctcgtacactcaaaatattgaaactgctttgtgtgtacatccaaataggccccgcctttttctcgttcactcacggggaaaaggcaaaaatcttgaccccaaccaatatcaggccgccgacatcttgcgagttcctctatcttatccaattttcgtctacttttcttttcgattttcacatttccaattttaattttccaggacaaat | pOH596 | | strain  not available | This paper |
| *cho-1 prom5::nls::tagrfp* | pOH633 | ggtttcaaaaatgaaatcattctcagcgctcccttttgtaatcagatatccttcgaaaaaaagaataccgtcaatcttcttaaatttcctcaaatttcaagccttttctggaaccccggttccaaatttctgacggcttcttacaaaagcatatgcacaaatcttttgctcgtaaatcatgtgcattcgaaatgatgaggtgggccctttcggggtgagaccggtctcttagcattccgcccccaatttttccaaactttttctgccattcactcaaatatccattcaattttcgtttgaaaataaactttttttttcattcattcaatttcaatttagcatagaacttcgaggagtcatttgttgtataattgaattcctttatcaagattagtgaggtggagcacggggcacgtcatttcagtaatccaggtcactgttacccttatttttccattaagtgttctgtgcgaattgaaaaatgttagaatcaggaatattgtggccaagatgtttgcggagactagttatctgaaaacatttcagtccctagtaaaatgaagttatcaccttcagaatgttaggctgattacttcttcaacttttgcctttttctaattttaagctccgcccacttcttggctgtttttttttgagttaacctcgcccatttatcacaatgttgtatatttcaactccgcccacttatcgggattttttgcatttgtaactccacccgtttcttggtgcttgttttttgcactgtgagctcctcccaattattgatagtttagatttaggctccgcccctttctttactgtttttcgcgttatgcccagccacaaatctataattttacagttttagctccgcttgaatgctttcctatcagtaaaattctcggtgtttttacattcgatctctagaattttcggaaattttttggtgttggaaggcgtgacgtcacacgagagctagtgtttagaagaacactaatgacgtcaccctaataattttcagaatttttttatctaaataaaaatggatccggtcctaaactatcttgctagtaattgtttgaaaagttgaaaattttcagaattttaacaaatttgttgtaatttcgaacataaattatgttgatcgagatatcaacttgaattttttttttaatacgtacatgtgcactcaacttcaactctaaaaataaaaaaacactatttctatattctagatctctttagtgatgtaataataagaatttccaagctatacacctagccaccgcctactcacctcattcagtttcccacgaagaattagaagaaaatgaagaaaaatggaattgaatagagtcagtgtgagtgtgtgaaatgaaaaaaaaatatatatcgatgtggcggtatctcggataaataattaactatttctcagtttttacttattctcagactctccttttttgcttttgaatatctcttcttcgtcgtcatcattgagatttttcttctaataatcgtaactttgtaattaaaagaacattcatttcgggtcttgcggcgaaaaatacatttaaaggtccacgggttcattagtatgggtctcactgcgagaaaaagtttatagtttgtatttagtattcacattgtttttgaaaataaattgaaatcgataaaaactaatcaatttgaaaaaaaatatttaaaaattctaccacaattaaatttttaaacttaatttaaaaaagaactacagcgtaatttttaaagttagaactacagagaactgtttctcgtacactcaaaatattgaaactgctttgtgtgtacatccaaataggccccgcctttttctcgttcactcacggggaaaaggcaaaaatcttgaccccaaccaatatcaggccgccgacatcttgcgagttcctctatcttatccaattttcgtctacttttcttttcgattttcacatttccaattttaattttccaggacaaat | pOH596 | | strain  not available | This paper |
| *cho-1 prom6::nls::tagrfp* | pOH634 | tgtggccaagatgtttgcggagactagttatctgaaaacatttcagtccctagtaaaatgaagttatcaccttcagaatgttaggctgattacttcttcaacttttgcctttttctaattttaagctccgcccacttcttggctgtttttttttgagttaacctcgcccatttatcacaatgttgtatatttcaactccgcccacttatcgggattttttgcatttgtaactccacccgtttcttggtgcttgttttttgcactgtgagctcctcccaattattgatagtttagatttaggctccgcccctttctttactgtttttcgcgttatgcccagccacaaatctataattttacagttttagctccgcttgaatgctttcctatcagtaaaattctcggtgtttttacattcgatctctagaattttcggaaattttttggtgttggaaggcgtgacgtcacacgagagctagtgtttagaagaacactaatgacgtcaccctaataattttcagaatttttttatctaaataaaaatggatccggtcctaaactatcttgctagtaattgtttgaaaagttgaaaattttcagaattttaacaaatttgttgtaatttcgaacataaattatgttgatcgagatatcaacttgaattttttttttaatacgtacatgtgcactcaacttcaactctaaaaataaaaaaacactatttctatattctagatctctttagtgatgtaataataagaatttccaagctatacacctagccaccgcctactcacctcattcagtttcccacgaagaattagaagaaaatgaagaaaaatggaattgaatagagtcagtgtgagtgtgtgaaatgaaaaaaaaatatatatcgatgtggcggtatctcggataaataattaactatttctcagtttttacttattctcagactctccttttttgcttttgaatatctcttcttcgtcgtcatcattgagatttttcttctaataatcgtaactttgtaattaaaagaacattcatttcgggtcttgcggcgaaaaatacatttaaaggtccacgggttcattagtatgggtctcactgcgagaaaaagtttatagtttgtatttagtattcacattgtttttgaaaataaattgaaatcgataaaaactaatcaatttgaaaaaaaatatttaaaaattctaccacaattaaatttttaaacttaatttaaaaaagaactacagcgtaatttttaaagttagaactacagagaactgtttctcgtacactcaaaatattgaaactgctttgtgtgtacatccaaataggccccgcctttttctcgttcactcacggggaaaaggcaaaaatcttgaccccaaccaatatcaggccgccgacatcttgcgagttcctctatcttatccaattttcgtctacttttcttttcgattttcacatttccaattttaattttccaggacaaat | pOH596 | | strain  not available | This paper |
| *cho-1 prom7::nls::tagrfp* | pOH635 | cgtcaccctaataattttcagaatttttttatctaaataaaaatggatccggtcctaaactatcttgctagtaattgtttgaaaagttgaaaattttcagaattttaacaaatttgttgtaatttcgaacataaattatgttgatcgagatatcaacttgaattttttttttaatacgtacatgtgcactcaacttcaactctaaaaataaaaaaacactatttctatattctagatctctttagtgatgtaataataagaatttccaagctatacacctagccaccgcctactcacctcattcagtttcccacgaagaattagaagaaaatgaagaaaaatggaattgaatagagtcagtgtgagtgtgtgaaatgaaaaaaaaatatatatcgatgtggcggtatctcggataaataattaactatttctcagtttttacttattctcagactctccttttttgcttttgaatatctcttcttcgtcgtcatcattgagatttttcttctaataatcgtaactttgtaattaaaagaacattcatttcgggtcttgcggcgaaaaatacatttaaaggtccacgggttcattagtatgggtctcactgcgagaaaaagtttatagtttgtatttagtattcacattgtttttgaaaataaattgaaatcgataaaaactaatcaatttgaaaaaaaatatttaaaaattctaccacaattaaatttttaaacttaatttaaaaaagaactacagcgtaatttttaaagttagaactacagagaactgtttctcgtacactcaaaatattgaaactgctttgtgtgtacatccaaataggccccgcctttttctcgttcactcacggggaaaaggcaaaaatcttgaccccaaccaatatcaggccgccgacatcttgcgagttcctctatcttatccaattttcgtctacttttcttttcgattttcacatttccaattttaattttccaggacaaat | pOH596 | | strain  not available | This paper |
| *cho-1prom8::yfp* | p2NY_Pcho-1_280bp | gagctctttgcgggagggggtgagcctcggtgtgccagaagtagtgtagaatagaggaagagagcgccaaaaaactcgaatgatgtatacacgagaagctgctcttcctgctcctcttctaccatcacaacgacacaaaaacggtctccagggagagaaatgagaagagggaggataggggaaactccaaaaagacttgaagcctccagtctctcgagcggacacacacaatttgttcacgcctttcacgttttcttggtgtcatgttttttgttcatgt | pPD95.75 | | *otEx5290, otEx5291* | Kratsios et al., 2015 |
| *cho-1*  *prom9::nls::tagrfp* | pOH636 | gagagcgccaaaaaactcgaatgatgtatacacgagaagctgctcttcctgctcctcttctaccatcacaacgacacaaaaacggtctccagggagagaaatgagaagagggaggataggggaaactccaaaaagacttgaagcctccagtctctcgagcggacacacacaatttgttcacgcctttcacgttttcttggtgtcatgttttttgttcatgtatttcaaaataacggtttttttccgtttttaattttgggtcttaccgcgaatttctaagaggcggctaactttatgtgttcatgagttgtttgaaatatcaatttggcacagcaattactctaatacatgctttaaaatgggcgggctactactgtccattttgtgggcggggtttgatttgttccgctcatttttagcgctgcggtaagagctttcagtaaaatcaattttaacttttcattaaacattttaggccggaaatttgaattttttttgtgggtcaggaaacctacgtggccgcgttaacagtctgtcactttcaaaatatatttattattagatttgcaactttttttttttgaaaacccctccacaaaacagtagataacccttttcagaacaacttggtcaaatttgcctactaggcacaaaccaactcctacgtacctgcctataatacaatcttctatgtgtaaaatatggcacacatgcgactttgaaacccagtttcattacaacctgtagagaatagtagagaaaaggcaggcagatgaatcttttttaaattttattttaggacaaaatgttgaaggtaaaaatctagcttcaaaatgacctacaaataggccccacccatatcttggttttactgaattttttatcaaaagttttccagtgttgatcggtattttttgaagaccttccacgtaggcattgcctgcgtgcatgcctacgcctacctcgtgtatacctcgtggcaggcaggtaaggcgttttcagcccgagcgttgtggaagcccccctggaaaacctcaatatgatcaaccaccacacagctgatgtgtgggggaccaccttcattgaggcggcctgaatctatttaggaaatctaaatgaaatcttcttcacatctatctaattatcctcctctctcccactcttcccattcaatttttttcgaaaaaatagatcgtgacgacgcgagaatctgagctcaaaaacacgagcagtaggcacccatcaatttctccacccctccgctgctctcaactctgaaattagagccttcaccacggctccattcttcttctcgcgcgccttgattgacgattatctcgacatttccgtcagtcagggcttttcactctttccgcttcgaaaagtcgtgtgcttcttcttcttcttgctccgccgctgctccgaattggttacggaaacttgaactttcttcgatgttttcttcttcgtcgtagtcttcccagtgacgtcgtcttcttttctttttcttattgcttgtgctgctcaccaccaaaatcattgcaaattcaattgagaactcgcggcggcgatgtctccaagtgttcgaaacagacaaaaaactaaataaaagaaaaagaagaagcatgacatgttgcctttaaattcttcctcaatttttcttcaaacttccacccccacagtggcaaaaaaccacatttgctccgtggccgcgtgacaaaaattgatggctgagttttcatctctcgcggccacgtaggatactagaaagaagagtgccctctagaaaactcggccacgggtgcgcggaatttcaaatttcctctgggtttttgaagattccgagcaactttcgttttagtctaggtccgagaaaattcgcggccgccaattttttacggccatgtaggaaaaaattcattttaggagcattgaatgatattgtaggtcctaccgaatttctaaagcgattaccgtacccgtttaaaggcgcatgccacttttcaccacccttcacgacctataaatttattttcgatagttgcaaaaaaagcgaagaaaacaagaaacgcttgacaaaacatttccgcagttgcaaatcctttcttaaaacttgtttgattggctcaatccgttgctcttttgctcatcctcctctctttcccatacacacacatcgaaatatgaatcttctcttaaaaagaaggttgtccaattagtttcccctattcatttttccatgttttcttataacaactttttcttttgaatactcctccagaaatgataaatctttgtgagatgccaattaaaatttatttttgaattttatttgttgaaggattttatttgttgaatgacctaaatagaggctccgcccatatcttggctttctgcaatt | pOH596 | | strain  not available | This paper |
| *cho-1*  *prom10::nls::tagrfp* | pOH637 | gagagcgccaaaaaactcgaatgatgtatacacgagaagctgctcttcctgctcctcttctaccatcacaacgacacaaaaacggtctccagggagagaaatgagaagagggaggataggggaaactccaaaaagacttgaagcctccagtctctcgagcggacacacacaatttgttcacgcctttcacgttttcttggtgtcatgttttttgttcatgtatttcaaaataacggtttttttccgtttttaattttgggtcttaccgcgaatttctaagaggcggctaactttatgtgttcatgagttgtttgaaatatcaatttggcacagcaattactctaatacatgctttaaaatgggcgggctactactgtccattttgtgggcggggtttgatttgttccgctcatttttagcgctgcggtaagagctttcagtaaaatcaattttaacttttcattaaacattttaggccggaaatttgaattttttttgtgggtcaggaaacctacgtggccgcgttaacagtctgtcactttcaaaatatatttattattagatttgcaactttttttttttgaaaacccctccacaaaacagtagataacccttttcagaacaacttggtcaaatttgcctactaggcacaaaccaactcctacgtacctgcctataatacaatcttctatgtgtaaaatatggcacacatgcgactttgaaacccagtttcattacaacctgtagagaatagtagagaaaaggcaggcagatgaatcttttttaaattttattttaggacaaaatgttgaaggtaaaaatctagcttcaaaatgacctacaaataggccccacccatatcttggttttactgaattttttatcaaaagttttccagtgttgatcggtattttttgaagaccttccacgtaggcattgcctgcgtgcatgcctacgcctacctcgtgtatacctcgtggcaggcaggtaaggcgttttcagcccgagcgttgtggaagcccccctggaaaacctcaatatgatcaaccaccacacagctgatgtgtgggggaccaccttcattgaggcggcctgaatctatttaggaaatctaaatgaaatcttcttcacatctatctaattatcctcctctctcccactcttcccattcaatttttttcgaaaaaatagatcgtgacgacgcgagaatctgagctcaaaaacacgagcagtaggcacccatcaatttctccacccctccgctgctctcaactctgaaattagagccttcaccacggctccattcttcttctcgcgcgccttgattgacgattatctcgacatttccgtcagtcagggcttttcactctttccgcttcgaaaagtcgtgtgcttcttctt | pOH596 | | strain  not available | This paper |
| *cho-1*  *prom11::nls::tagrfp* | pOH638 | cttcttgctccgccgctgctccgaattggttacggaaacttgaactttcttcgatgttttcttcttcgtcgtagtcttcccagtgacgtcgtcttcttttctttttcttattgcttgtgctgctcaccaccaaaatcattgcaaattcaattgagaactcgcggcggcgatgtctccaagtgttcgaaacagacaaaaaactaaataaaagaaaaagaagaagcatgacatgttgcctttaaattcttcctcaatttttcttcaaacttccacccccacagtggcaaaaaaccacatttgctccgtggccgcgtgacaaaaattgatggctgagttttcatctctcgcggccacgtaggatactagaaagaagagtgccctctagaaaactcggccacgggtgcgcggaatttcaaatttcctctgggtttttgaagattccgagcaactttcgttttagtctaggtccgagaaaattcgcggccgccaattttttacggccatgtaggaaaaaattcattttaggagcattgaatgatattgtaggtcctaccgaatttctaaagcgattaccgtacccgtttaaaggcgcatgccacttttcaccacccttcacgacctataaatttattttcgatagttgcaaaaaaagcgaagaaaacaagaaacgcttgacaaaacatttccgcagttgcaaatcctttcttaaaacttgtttgattggctcaatccgttgctcttttgctcatcctcctctctttcccatacacacacatcgaaatatgaatcttctcttaaaaagaaggttgtccaattagtttcccctattcatttttccatgttttcttataacaactttttcttttgaatactcctccagaaatgataaatctttgtgagatgccaattaaaatttatttttgaattttatttgttgaaggattttatttgttgaatgacctaaatagaggctccgcccatatcttggctttctgcaatttgcataaaaggttttccagttttcgtaggtattttttgaaggtcttccacgtaggcgttgccggcgtgcctacgcataccttctgcatattgccaaagtacttctgaatcctttcttccaactatttgattgaatagagaaaaccgaggaactacactaggtaggcaggcaggtcgacaggcagtggctaccttagctgaccagtgaattttttttcaaatcgtgttattgagacacttgtgcagaagtttaaagtgcacagttttaaaatattaggcgtcttgttcaaatttgaattttaatgcctaaatagataggtaggtaggtaggcagcacggtaggcaagaagtaagataggtaggaaggtatgttagtaactattttataaactatatacgttatcgaaaggatctaaaatttttctttggggttcaaaaaaggtcctagttttttgcaataaaaaaaacacaatcaacgccaacgctctagctaggtaggcaagccggtaggtaggcacgcagataaattggctagtaggtaggtaggtaggtaggtgggtaggtaggtaggtaagtaggtatatagctataggtaagtgagtaagtaagctgtatttttgtggttctgagagcttactacaattttttctgaaaattcgtattattttttaaaataaaaaaagctatcaaccctcttctaaggtttcaaaaatgaaatcattctcagcgctcccttttgtaatcagatatccttcgaaaaaaagaataccgtcaatcttcttaaatttcctcaaatttcaagccttttctggaaccccggttccaaatttctgacggcttcttacaaaagcatatgcacaaatcttttgctcgtaaatcatgtgcattcgaaatgatgaggtgggccctttcggggtgagaccggtctcttagcattccgcccccaatttttccaaactttttctgccattcactcaaatatccattcaattttcgtttgaaaataaactttttttttcattcattcaatttcaatttagcatagaacttcgaggagtcatttgttgtataattgaattcctttatcaagattagtgaggtggagcacggggcacgtcatttcagtaatccaggtcactgttacccttatttttccattaagtgttctgtgcgaattgaaaaatgttagaatcaggaatattgtggccaagatgtttgcggagactagttatctgaaaacatttcagtccctagtaaaatgaagttatcaccttcagaatgttaggctgattacttcttcaacttttgcctttttctaattttaagctccgcccacttcttggctgtttttttttgagttaacctcgcccatttatcacaatgttgtatatttcaactccgcccacttatcgggattttttgcatttgtaactccacccgtttcttggtgcttgttttttgcactgtgagctcctcccaattattgatagtttagatttaggctccgcccctttctttactgtttttcgcgttatgcccagccacaaatctataattttacagttttagctccgcttgaatgctttcctatcagtaaaattctcggtgtttttacattcgatctctagaattttcggaaattttttggtgttggaaggcgtgacgtcacacgagagctagtgtttagaagaacactaatgacgtcaccctaataattttcagaatttttttatctaaataaaaatggatccggtcctaaactatcttgctagtaattgtttgaaaagttgaaaattttcagaattttaacaaatttgttgtaatttcgaacataaattatgttgatcgagatatcaacttgaattttttttttaatacgtacatgtgcactcaacttcaactctaaaaataaaaaaacactatttctatattctagatctctttagtgatgtaataataagaatttccaagctatacacctagccaccgcctactcacctc | pOH596 | | strain  not available | This paper |
| *cho-1*  *prom12::nls::tagrfp* | pOH639 | cttcttgctccgccgctgctccgaattggttacggaaacttgaactttcttcgatgttttcttcttcgtcgtagtcttcccagtgacgtcgtcttcttttctttttcttattgcttgtgctgctcaccaccaaaatcattgcaaattcaattgagaactcgcggcggcgatgtctccaagtgttcgaaacagacaaaaaactaaataaaagaaaaagaagaagcatgacatgttgcctttaaattcttcctcaatttttcttcaaacttccacccccacagtggcaaaaaaccacatttgctccgtggccgcgtgacaaaaattgatggctgagttttcatctctcgcggccacgtaggatactagaaagaagagtgccctctagaaaactcggccacgggtgcgcggaatttcaaatttcctctgggtttttgaagattccgagcaactttcgttttagtctaggtccgagaaaattcgcggccgccaattttttacggccatgtaggaaaaaattcattttaggagcattgaatgatattgtaggtcctaccgaatttctaaagcgattaccgtacccgtttaaaggcgcatgccacttttcaccacccttcacgacctataaatttattttcgatagttgcaaaaaaagcgaagaaaacaagaaacgcttgacaaaacatttccgcagttgcaaatcctttcttaaaacttgtttgattggctcaatccgttgctcttttgctcatcctcctctctttcccatacacacacatcgaaatatgaatcttctcttaaaaagaaggttgtccaattagtttcccctattcatttttccatgttttcttataacaactttttcttttgaatactcctccagaaatgataaatctttgtgagatgccaattaaaatttatttttgaattttatttgttgaaggattttatttgttgaatgacctaaatagaggctccgcccatatcttggctttctgcaatttgcataaaaggttttccagttttcgtaggtattttttgaaggtcttccacgtaggcgttgccggcgtgcctacgcataccttctgcatattgccaaagtacttctgaatcctttcttccaactatttgattgaatagagaaaaccgaggaactacactaggtaggcaggcaggtcgacaggcagtggctaccttagctgaccagtgaattttttttcaaatcgtgttattgagacacttgtgcagaagtttaaagtgcacagttttaaaatattaggcgtcttgttcaaatttgaattttaatgcctaaatagataggtaggtaggtaggcagcacggtaggcaagaagtaagataggtaggaaggtatgttagtaactattttataaactatatacgttatcgaaaggatctaaaatttttctttggggttcaaaaaaggtcctagttttttgcaataaaaaaaacacaatcaacgccaacgctctagctaggtaggcaagccggtaggtaggcacgcagataaattggctagtaggtaggtaggtaggtaggtgggtaggtaggtaggtaagtaggtatatagctataggtaagtgagtaagtaagctgtatttttgtggttctgagagcttactacaattttttctgaaaattcgtattattttttaaaataaaaaaagctatcaaccctcttctaaggtttcaaaaatgaaatcattctcagcgctcccttttgtaatcagatatccttcgaaaaaaagaataccgtcaatcttcttaaatttcctcaaatttcaagccttttctggaaccccggttccaaatttctgacggcttcttacaaaagcatatgcacaaatcttttgctcgtaaatcatgtgcattcgaaatgatgaggtgggccctttcggggtgagaccggtctcttagcattccgcccccaatttttccaaactttttctgccattcactcaaatatccattcaattttcgtttga | pOH596 | | strain  not available | This paper |
| *cho-1*  *prom13::nls::tagrfp* | pOH640 | cttcttgctccgccgctgctccgaattggttacggaaacttgaactttcttcgatgttttcttcttcgtcgtagtcttcccagtgacgtcgtcttcttttctttttcttattgcttgtgctgctcaccaccaaaatcattgcaaattcaattgagaactcgcggcggcgatgtctccaagtgttcgaaacagacaaaaaactaaataaaagaaaaagaagaagcatgacatgttgcctttaaattcttcctcaatttttcttcaaacttccacccccacagtggcaaaaaaccacatttgctccgtggccgcgtgacaaaaattgatggctgagttttcatctctcgcggccacgtaggatactagaaagaagagtgccctctagaaaactcggccacgggtgcgcggaatttcaaatttcctctgggtttttgaagattccgagcaactttcgttttagtctaggtccgagaaaattcgcggccgccaattttttacggccatgtaggaaaaaattcattttaggagcattgaatgatattgtaggtcctaccgaatttctaaagcgattaccgtacccgtttaaaggcgcatgccacttttcaccacccttcacgacctataaatttattttcgatagttgcaaaaaaagcgaagaaaacaagaaacgcttgacaaaacatttccgcagttgcaaatcctttcttaaaacttgtttgattggctcaatccgttgctcttttgctcatcctcctctctttcccatacacacacatcgaaatatgaatcttctcttaaaaagaaggttgtccaattagtttcccctattcatttttccatgttttcttataacaactttttcttttgaatactcctccagaaatgataaatctttgtgagatgccaattaaaatttatttttgaattttatttgttgaaggattttatttgttgaatgacctaaatagaggctccgcccatatcttggctttctgcaatt | pOH596 | | strain  not available | This paper |
| *cho-1*  *prom14::nls::tagrfp* | pOH641 | cttcttgctccgccgctgctccgaattggttacGGAAACttgaactttcttcgatgttttcttcttcgtcgtagtcttcccagtgacgtcgtcttcttttctttttcttattgcttgtgctgctcaccaccaaaatcattgcaaattcaattgagaactcgcggcggcgatgtctccaagtgttcgaaacagacaaaaaactaaataaaagaaaaagaagaagcatgacatgttgcctttaaattcttcctcaatttttcttcaaacttccacccccacagtggcaaaaaaccacatttgctccgtggccgcgtgacaaaaattgatggctgagttttcatctctcgcggccacgtaggatactagaaagaagagtgccctctagaaaactcggccacgg | pOH596 | | otEx7576 | This paper |
| *cho-1*  *prom15::nls::tagrfp* | pOH642 | gtgcgcggaatttcaaatttcctctgggtttttgaagattccgagcaactttcgttttagtctaggtccgagaaaattcgcggccgccaattttttacggccatgtaggaaaaaattcattttaggagcattgaatgatattgtaggtcctaccgaatttctaaagcgattaccgtacccgtttaaaggcgcatgccacttttcaccacccttcacgacctataaatttattttcgatagttgcaaaaaaagcgaagaaaacaagaaacgcttgacaaaacatttccgcagttgcaaatcctttcttaaaacttgtttgatTGGCtcaatccgttgctcttttgctcatcctcctctctttcccatacacacacatcgaaatatgaatcttctcttaaaaagaaggttgtccaattagtttcccctattcatttttccatgttttcttataacaactttttcttttgaatactcctccagaaatgataaatctttgtgagatgccaattaaaatttatttttgaattttatttgttgaaggattttatttgttgaatgacctaaatagaggctccgcccatatcttggctttctgcaatt | pOH596 | | otEx7574 | This paper |
| *cho-1*  *prom16::nls::tagrfp* | pOH643 | ggtttcaaaaatgaaatcattctcagcgctcccttttgtaatcagatatccttcgaaaaaaagaataccgtcaatcttcttaaatttcctcaaatttcaagccttttctggaaccccggttccaaatttctgacggcttcttacaaaagcatatgcacaaatcttttgctcgtaaatcatgtgcattcgaaatgatgaggtgggccctttcggggtgagaccggtctcttagcattccgcccccaatttttccaaactttttctgccattcactcaaatatccattcaattttcgtttgaaaataaactttttttttcattcattcaatttcaatttagcatagaacttcgaggagtcatttgttgtataattgaattcctttatcaagattagtgaggtggagcacggggcacgtcatttcagtaatccaggtcactgttacccttatttttccattaagtgttctgtgcgaattgaaaaatgttagaatcaggaatattgtggccaagatgtttgcggagactagttatctgaaaacatttcagtccctagtaaaatgaagttatcaccttcagaatgttaggctgattacttcttcaacttttgcctttttctaattttaagctccgcccacttcttggctgtttttttttgagttaacctcgcccatttatcacaatgttgtatatttcaactccgcccacttatcgggattttttgcatttgtaactccacccgtttcttggtgcttgttttttgcactgtgagctcctcccaattattgatagtttagatttaggctccgcccctttctttactgtttttcgcgttatgcccagccacaaatctataattttacagttttagctccgcttgaatgctttcctatcagtaaaattctcggtgtttttacattcgatctctagaattttcggaaattttttggtgttggaaggcgtgacgtcacacgagagctagtgtttagaagaacactaatgacgtcaccctaataattttcagaatttttttatctaaataaaaatggatccggtcctaaactatcttgctagtaattgtttgaaaagttgaaaattttcagaattttaacaaatttgttgtaatttcgaacataaattatgttgatcgagatatcaacttgaattttttttttaatacgtacatgtgcactcaacttcaactctaaaaataaaaaaacactatttctatattctagatctctttagtgatgtaataataagaatttccaagctatacacctagccaccgcctactcacctc | pOH596 | | otEx7575 | This paper |
| *cho-1*  *prom17::nls::yfp*  *::h2b* | na | ctcgagcggacacacacaatttgttcacgcctttcacgttttcttggtgtcatgttttttgttcatgtatttcaaaataacggtttttttccgtttttaattttgggtcttaccgcgaatttctaagaggcggctaactttatgtgttcatgagttgtttgaaatatcaatttggcacagcaattactctaatacatgctttaaaatgggcgggctactactgtccattttgtgggcggggtttgatttgttccgctcatttttagcgctgcggtaagagctttcagtaaaatcaattttaacttttcattaaacattttaggccggaaatttgaattttttttgtgggtcaggaaacctacgtggccgcgttaacagtctgtcactttcaaaatatatttattattagatttgcaactttttttttttgaaaacccctccacaaaacagtagataacccttttcagaacaacttggtcaaatttgcctactaggcacaaaccaactcctacgtacctgcctataatacaatcttctatgtgtaaaatatggcacacatgcgactttgaaacccagtttcattacaacctgtagagaatagtagagaaaaggcaggcagatgaatcttttttaaattttattttaggacaaaatgttgaaggtaaaaatctagcttcaaaatgacctacaaataggccccacccatatcttggttttactgaattttttatcaaaagttttccagtgttgatcggtattttttgaagaccttccacgtaggcattgcctgcgtgcatgcctacgcctacctcgtgtatacctcgtggcaggcaggtaaggcgttttcagcccgagcgttgtggaagcccccctggaaaacctcaatatgatcaaccaccacacagctgatgtgtgggggaccaccttcattgaggcggcctgaatctatttaggaaatctaaatgaaatcttcttcacatctatctaattatcctcctctctcccactcttcccattcaatttttttcgaaaaaatagatcgtgacgacgcgagaatctgagctcaaaaacacgagcagtaggcacccatcaatttctccacccctccgctgctctcaactctgaaattagagccttcaccacggctccattcttcttctcgcgcgccttgattgacgattatctcgacatttccgtcagtcagggcttttcactctttccgcttcgaaaagtcgtgtgcttcttcttcttcttgctccgccgctgctccgaattggttacggaaacttgaactttcttcgatgttttcttcttcgtcgtagtcttcccagtgacgtcgtcttcttttctttttcttattgcttgtgctgctcaccaccaaaatcattgcaaattcaattgagaactcgcggcggcgatgtctccaagtgttcgaaacagacaaaaaactaaataaaagaaaaagaagaagcatgacatgttgcctttaaattcttcctcaatttttcttcaaacttccacccccacagtggcaaaaaaccacatttgctccgtggccgcgtgacaaaaattgatggctgagttttcatctctcgcggccacgtaggatactagaaagaagagtgccctctagaaaactcggccacgggtgcgcggaatttcaaatttcctctgggtttttgaagattccgagcaactttcgttttagtctaggtccgagaaaattcgcggccgccaattttttacggccatgtaggaaaaaattcattttaggagcattgaatgatattgtaggtcctaccgaatttctaaagcgattaccgtacccgtttaaaggcgcatgccacttttcaccacccttcacgacctataaatttattttcgatagttgcaaaaaaagcgaagaaaacaagaaacgcttgacaaaacatttccgcagttgcaaatcctttcttaaaacttgtttgattggctcaatccgttgctcttttgctcatcctcctctctttcccatacacacacatcgaaatatgaatcttctcttaaaaagaaggttgtccaattagtttcccctattcatttttccatgttttcttataacaactttttcttttgaatactcctccagaaatgataaatctttgtgagatgccaattaaaatttatttttgaattttatttgttgaaggattttatttgttgaatgacctaaatagaggctccgcccatatcttggctttctgcaatttgcataaaaggttttccagttttcgtaggtattttttgaaggtcttccacgtaggcgttgccggcgtgcctacgcataccttctgcatattgccaaagtacttctgaatcctttcttccaactatttgattgaatagagaaaaccgaggaactacactaggtaggcaggcaggtcgacaggcagtggctaccttagctgaccagtgaattttttttcaaatcgtgttattgagacacttgtgcagaagtttaaagtgcacagttttaaaatattaggcgtcttgttcaaatttgaattttaatgcctaaatagataggtaggtaggtaggcagcacggtaggcaagaagtaagataggtaggaaggtatgttagtaactattttataaactatatacgttatcgaaaggatctaaaatttttctttggggttcaaaaaaggtcctagttttttgcaataaaaaaaacacaatcaacgccaacgctctagctaggtaggcaagccggtaggtaggcacgcagataaattggctagtaggtaggtaggtaggtaggtgggtaggtaggtaggtaagtaggtatatagctataggtaagtgagtaagtaagctgtatttttgtggttctgagagcttactacaattttttctgaaaattcgtattattttttaaaataaaaaaagctatcaaccctcttctaaggtttcaaaaatgaaatcattctcagcgctcccttttgtaatcagatatccttcgaaaaaaagaataccgtcaatcttcttaaatttcctcaaatttcaagccttttctggaaccccggttccaaatttctgacggcttcttacaaaagcatatgcacaaatcttttgctcgtaaatcatgtgcattcgaaatgatgaggtgggccctttcggggtgagaccggtctcttagcattccgcccccaatttttccaaactttttctgccattcactcaaatatccattcaattttcgtttgaaaataaactttttttttcattcattcaatttcaatttagcatagaacttcgaggagtcatttgttgtataattgaattcctttatcaagattagtgaggtggagcacggggcacgtcatttcagtaatccaggtcactgttacccttatttttccattaagtgttctgtgcgaattgaaaaatgttagaatcaggaatattgtggccaagatgtttgcggagactagttatctgaaaacatttcagtccctagtaaaatgaagttatcaccttcagaatgttaggctgattacttcttcaacttttgcctttttctaattttaagctccgcccacttcttggctgtttttttttgagttaacctcgcccatttatcacaatgttgtatatttcaactccgcccacttatcgggattttttgcatttgtaactccacccgtttcttggtgcttgttttttgcactgtgagctcctcccaattattgatagtttagatttaggctccgcccctttctttactgtttttcgcgttatgcccagccacaaatctataattttacagttttagctccgcttgaatgctttcctatcagtaaaattctcggtgtttttacattcgatctctagaattttcggaaattttttggtgttggaaggcgtgacgtcacacgagagctagtgtttagaagaacactaatgacgtcaccctaataattttcagaatttttttatctaaataaaaatggatccggtcctaaactatcttgctagtaattgtttgaaaagttgaaaattttcagaattttaacaaatttgttgtaatttcgaacataaattatgttgatcgagatatcaacttgaattttttttttaatacgtacatgtgcactcaacttcaactctaaaaataaaaaaacactatttctatattctagatctctttagtgatgtaataataagaatttccaagctatacacctagccaccgcctactcacctcattcagtttcccacgaagaattagaagaaaatgaagaaaaatggaattgaatagagtcagtgtgagtgtgtgaaatgaaaaaaaaatatatatcgatgtggcggtatctcggataaataattaactatttctcagtttttacttattctcagactctccttttttgcttttgaatatctcttcttcgtcgtcatcattgagatttttcttctaataatcgtaactttgtaattaaaagaacattcatttcgggtcttgcggcgaaaaatacatttaaaggtccacgggttcattagtatgggtctcactgcgagaaaaagtttatagtttgtatttagtattcacattgtttttgaaaataaattgaaatcgataaaaactaatcaatttgaaaaaaaatatttaaaaattctaccacaattaaatttttaaacttaatttaaaaaagaactacagcgtaatttttaaagttagaactacagagaactgtttctcgtacactcaaaatattgaaactgctttgtgtgtacatccaaataggccccgcctttttctcgttcactcacggggaaaaggcaaaaatcttgaccccaaccaatatcaggccgccgacatcttgcgagttcctctatcttatccaattttcgtctacttttcttttcgattttcacatttccaattttaattttccaggacaaat | Recombined Fosmid WRM0613dC12 digested with Xho-1 | | strain  not available | This paper |
| *cho-1*  *prom18::nls::yfp::*  *h2b* | na | gcggccgccaattttttacggccatgtaggaaaaaattcattttaggagcattgaatgatattgtaggtcctaccgaatttctaaagcgattaccgtacccgtttaaaggcgcatgccacttttcaccacccttcacgacctataaatttattttcgatagttgcaaaaaaagcgaagaaaacaagaaacgcttgacaaaacatttccgcagttgcaaatcctttcttaaaacttgtttgattggctcaatccgttgctcttttgctcatcctcctctctttcccatacacacacatcgaaatatgaatcttctcttaaaaagaaggttgtccaattagtttcccctattcatttttccatgttttcttataacaactttttcttttgaatactcctccagaaatgataaatctttgtgagatgccaattaaaatttatttttgaattttatttgttgaaggattttatttgttgaatgacctaaatagaggctccgcccatatcttggctttctgcaatttgcataaaaggttttccagttttcgtaggtattttttgaaggtcttccacgtaggcgttgccggcgtgcctacgcataccttctgcatattgccaaagtacttctgaatcctttcttccaactatttgattgaatagagaaaaccgaggaactacactaggtaggcaggcaggtcgacaggcagtggctaccttagctgaccagtgaattttttttcaaatcgtgttattgagacacttgtgcagaagtttaaagtgcacagttttaaaatattaggcgtcttgttcaaatttgaattttaatgcctaaatagataggtaggtaggtaggcagcacggtaggcaagaagtaagataggtaggaaggtatgttagtaactattttataaactatatacgttatcgaaaggatctaaaatttttctttggggttcaaaaaaggtcctagttttttgcaataaaaaaaacacaatcaacgccaacgctctagctaggtaggcaagccggtaggtaggcacgcagataaattggctagtaggtaggtaggtaggtaggtgggtaggtaggtaggtaagtaggtatatagctataggtaagtgagtaagtaagctgtatttttgtggttctgagagcttactacaattttttctgaaaattcgtattattttttaaaataaaaaaagctatcaaccctcttctaaggtttcaaaaatgaaatcattctcagcgctcccttttgtaatcagatatccttcgaaaaaaagaataccgtcaatcttcttaaatttcctcaaatttcaagccttttctggaaccccggttccaaatttctgacggcttcttacaaaagcatatgcacaaatcttttgctcgtaaatcatgtgcattcgaaatgatgaggtgggccctttcggggtgagaccggtctcttagcattccgcccccaatttttccaaactttttctgccattcactcaaatatccattcaattttcgtttgaaaataaactttttttttcattcattcaatttcaatttagcatagaacttcgaggagtcatttgttgtataattgaattcctttatcaagattagtgaggtggagcacggggcacgtcatttcagtaatccaggtcactgttacccttatttttccattaagtgttctgtgcgaattgaaaaatgttagaatcaggaatattgtggccaagatgtttgcggagactagttatctgaaaacatttcagtccctagtaaaatgaagttatcaccttcagaatgttaggctgattacttcttcaacttttgcctttttctaattttaagctccgcccacttcttggctgtttttttttgagttaacctcgcccatttatcacaatgttgtatatttcaactccgcccacttatcgggattttttgcatttgtaactccacccgtttcttggtgcttgttttttgcactgtgagctcctcccaattattgatagtttagatttaggctccgcccctttctttactgtttttcgcgttatgcccagccacaaatctataattttacagttttagctccgcttgaatgctttcctatcagtaaaattctcggtgtttttacattcgatctctagaattttcggaaattttttggtgttggaaggcgtgacgtcacacgagagctagtgtttagaagaacactaatgacgtcaccctaataattttcagaatttttttatctaaataaaaatggatccggtcctaaactatcttgctagtaattgtttgaaaagttgaaaattttcagaattttaacaaatttgttgtaatttcgaacataaattatgttgatcgagatatcaacttgaattttttttttaatacgtacatgtgcactcaacttcaactctaaaaataaaaaaacactatttctatattctagatctctttagtgatgtaataataagaatttccaagctatacacctagccaccgcctactcacctcattcagtttcccacgaagaattagaagaaaatgaagaaaaatggaattgaatagagtcagtgtgagtgtgtgaaatgaaaaaaaaatatatatcgatgtggcggtatctcggataaataattaactatttctcagtttttacttattctcagactctccttttttgcttttgaatatctcttcttcgtcgtcatcattgagatttttcttctaataatcgtaactttgtaattaaaagaacattcatttcgggtcttgcggcgaaaaatacatttaaaggtccacgggttcattagtatgggtctcactgcgagaaaaagtttatagtttgtatttagtattcacattgtttttgaaaataaattgaaatcgataaaaactaatcaatttgaaaaaaaatatttaaaaattctaccacaattaaatttttaaacttaatttaaaaaagaactacagcgtaatttttaaagttagaactacagagaactgtttctcgtacactcaaaatattgaaactgctttgtgtgtacatccaaataggccccgcctttttctcgttcactcacggggaaaaggcaaaaatcttgaccccaaccaatatcaggccgccgacatcttgcgagttcctctatcttatccaattttcgtctacttttcttttcgattttcacatttccaattttaattttccaggacaaat | Recombined Fosmid WRM0613dC12 digested with NotI-Xho-1 | | strain  not available | This paper |
| *cho-1*  *prom19::nls::yfp::*  *h2b* | na | gtcgacaggcagtggctaccttagctgaccagtgaattttttttcaaatcgtgttattgagacacttgtgcagaagtttaaagtgcacagttttaaaatattaggcgtcttgttcaaatttgaattttaatgcctaaatagataggtaggtaggtaggcagcacggtaggcaagaagtaagataggtaggaaggtatgttagtaactattttataaactatatacgttatcgaaaggatctaaaatttttctttggggttcaaaaaaggtcctagttttttgcaataaaaaaaacacaatcaacgccaacgctctagctaggtaggcaagccggtaggtaggcacgcagataaattggctagtaggtaggtaggtaggtaggtgggtaggtaggtaggtaagtaggtatatagctataggtaagtgagtaagtaagctgtatttttgtggttctgagagcttactacaattttttctgaaaattcgtattattttttaaaataaaaaaagctatcaaccctcttctaaggtttcaaaaatgaaatcattctcagcgctcccttttgtaatcagatatccttcgaaaaaaagaataccgtcaatcttcttaaatttcctcaaatttcaagccttttctggaaccccggttccaaatttctgacggcttcttacaaaagcatatgcacaaatcttttgctcgtaaatcatgtgcattcgaaatgatgaggtgggccctttcggggtgagaccggtctcttagcattccgcccccaatttttccaaactttttctgccattcactcaaatatccattcaattttcgtttgaaaataaactttttttttcattcattcaatttcaatttagcatagaacttcgaggagtcatttgttgtataattgaattcctttatcaagattagtgaggtggagcacggggcacgtcatttcagtaatccaggtcactgttacccttatttttccattaagtgttctgtgcgaattgaaaaatgttagaatcaggaatattgtggccaagatgtttgcggagactagttatctgaaaacatttcagtccctagtaaaatgaagttatcaccttcagaatgttaggctgattacttcttcaacttttgcctttttctaattttaagctccgcccacttcttggctgtttttttttgagttaacctcgcccatttatcacaatgttgtatatttcaactccgcccacttatcgggattttttgcatttgtaactccacccgtttcttggtgcttgttttttgcactgtgagctcctcccaattattgatagtttagatttaggctccgcccctttctttactgtttttcgcgttatgcccagccacaaatctataattttacagttttagctccgcttgaatgctttcctatcagtaaaattctcggtgtttttacattcgatctctagaattttcggaaattttttggtgttggaaggcgtgacgtcacacgagagctagtgtttagaagaacactaatgacgtcaccctaataattttcagaatttttttatctaaataaaaatggatccggtcctaaactatcttgctagtaattgtttgaaaagttgaaaattttcagaattttaacaaatttgttgtaatttcgaacataaattatgttgatcgagatatcaacttgaattttttttttaatacgtacatgtgcactcaacttcaactctaaaaataaaaaaacactatttctatattctagatctctttagtgatgtaataataagaatttccaagctatacacctagccaccgcctactcacctcattcagtttcccacgaagaattagaagaaaatgaagaaaaatggaattgaatagagtcagtgtgagtgtgtgaaatgaaaaaaaaatatatatcgatgtggcggtatctcggataaataattaactatttctcagtttttacttattctcagactctccttttttgcttttgaatatctcttcttcgtcgtcatcattgagatttttcttctaataatcgtaactttgtaattaaaagaacattcatttcgggtcttgcggcgaaaaatacatttaaaggtccacgggttcattagtatgggtctcactgcgagaaaaagtttatagtttgtatttagtattcacattgtttttgaaaataaattgaaatcgataaaaactaatcaatttgaaaaaaaatatttaaaaattctaccacaattaaatttttaaacttaatttaaaaaagaactacagcgtaatttttaaagttagaactacagagaactgtttctcgtacactcaaaatattgaaactgctttgtgtgtacatccaaataggccccgcctttttctcgttcactcacggggaaaaggcaaaaatcttgaccccaaccaatatcaggccgccgacatcttgcgagttcctctatcttatccaattttcgtctacttttcttttcgattttcacatttccaattttaattttccaggacaaat | Recombined Fosmid WRM0613dC12 digested with SalI-Xho-1 | | strain  not available | This paper |
| *cho-1*  *prom20::nls::yfp::*  *h2b* | na | ggatccggtcctaaactatcttgctagtaattgtttgaaaagttgaaaattttcagaattttaacaaatttgttgtaatttcgaacataaattatgttgatcgagatatcaacttgaattttttttttaatacgtacatgtgcactcaacttcaactctaaaaataaaaaaacactatttctatattctagatctctttagtgatgtaataataagaatttccaagctatacacctagccaccgcctactcacctcattcagtttcccacgaagaattagaagaaaatgaagaaaaatggaattgaatagagtcagtgtgagtgtgtgaaatgaaaaaaaaatatatatcgatgtggcggtatctcggataaataattaactatttctcagtttttacttattctcagactctccttttttgcttttgaatatctcttcttcgtcgtcatcattgagatttttcttctaataatcgtaactttgtaattaaaagaacattcatttcgggtcttgcggcgaaaaatacatttaaaggtccacgggttcattagtatgggtctcactgcgagaaaaagtttatagtttgtatttagtattcacattgtttttgaaaataaattgaaatcgataaaaactaatcaatttgaaaaaaaatatttaaaaattctaccacaattaaatttttaaacttaatttaaaaaagaactacagcgtaatttttaaagttagaactacagagaactgtttctcgtacactcaaaatattgaaactgctttgtgtgtacatccaaataggccccgcctttttctcgttcactcacggggaaaaggcaaaaatcttgaccccaaccaatatcaggccgccgacatcttgcgagttcctctatcttatccaattttcgtctacttttcttttcgattttcacatttccaattttaattttccaggacaaat | Recombined Fosmid WRM0613dC12 digested with BamHI-Xho-1 | | strain  not available | This paper |
|  | | | | | | |
| *ace-2*  *prom1::2xnls::DsRed2* | na | ctccctatgaatatttgaacgacgcgcgcccaaaaaagaaacaaaaggaaagaagaaaatgaggaagaagaataagaaaacgctcttgccgttctctggggaacggctctcaatggctgcggggcgacaaattgagcaatccgaaggagagcttctttcacttttttgctagtgtttctaatactcttcttaatgcacttgtttccacatttttggggggcaccagaggaacttaggcaatgatttatgttttggaattggtgttgttgcatatcttgggggggatctggagccagtttttggatatttttacaaaatttacgactcgatgcaccatgatgctattgtattgcaaactgtgtttttgcggtcatgtgtgcctaccaatttttggaaaaaaaggaaatttttatttaatgcaaattaccgagtttttttttcagaaaatttgaatttttgggaaaattattttttcagataatatcaatttccgtctaaacctttttctagaaaatttgaatttcccggaaaaattatttttgcagctattttgaatttttggccaaactttcatcctagaaaatttgaatttcccgccaaaatttttttatctgaaagtttgattttcccgtcaaaattatttttcagctaccgtacccaaggtacagttttaaatttgaaaaaaaaatagttttttaaggttactgtatcgccaattttttctccatttcacaatttcgaaagaacttgcagaaaattgttgacacgatctacagtaaccttaaaggcacacgcacaaaattatgcagaatgcattctgcgtggcgagacccattttatgcgattttcaagaatacttcacacagttcttaaaaattcgtttcatgtcgacacccgaaaaaaaatcaattttgtttcaaaaattattaaaaacaacgaaaaaagtttgaactttaaaacttagttgctccaccaatacctaacgagacccaacgtttggcgttggagcgcgcttgcacctcgatttcaaaaagcgcacttttcaaaattccttttccgaactctaccaaaaaaaaaaatttttcttaaaaaatgagaaaattttcgaaaaattggttgtatgcatatttccgaaaggaagttttttgccctttgctccagcttcttcttctccttcttctcacatcgtccccctccccgccgtgtgagagacaaaataagtgtgttcggatttggtggtggagacccccgtcttccgatgatgatgatgatgatgggctcttctctctctctcactccagctccagagagctccctgtttgtcggaagaagtgaaatctccggggagtcaactcttttttttggcggagcacagagccccgaaaaaaaaacgaataggggtgacccatctaatactcattccgacattacggctcggaacctctttttatttggatgatccactgcttttgagccaccgagttacagtaaggttcaagcattccgatattttcgaaaaaaaaattatagtatttccagtaacttaggatctgatggcctagttttttccagctatctcggattttttaaggaccatgttttttgcgcaaactctacatttccaatttattccggaaatagttaaaaaaatgttttgagtcgttctgagacccaataattttaattttttggcagatggtgtgtcggcgcaaggcagacggaggtagtcttgtaggcaggct | PCR fusion | | *otEx4746* | Kratsios 2011 |
| *ace-2*  *prom2::2xnls::DsRed2* | na | atgcattctgcgtggcgagacccattttatgcgattttcaagaatacttcacacagttcttaaaaattcgtttcatgtcgacacccgaaaaaaaatcaattttgtttcaaaaattattaaaaacaacgaaaaaagtttgaactttaaaacttagttgctccaccaatacctaacgagacccaacgtttggcgttggagcgcgcttgcacctcgatttcaaaaagcgcacttttcaaaattccttttccgaactctaccaaaaaaaaaaatttttcttaaaaaatgagaaaattttcgaaaaattggttgtatgcatatttccgaaaggaagttttttgccctttgctccagcttcttcttctccttcttctcacatcgtccccctccccgccgtgtgagagacaaaataagtgtgttcggatttggtggtggagacccccgtcttccgatgatgatgatgatgatgggctcttctctctctctcactccagctccagagagctccctgtttgtcggaagaagtgaaatctccggggagtcaactcttttttttggcggagcacagagccccgaaaaaaaaacgaataggggtgacccatctaatactcattccgacattacggctcggaacctctttttatttggatgatccactgcttttgagccaccgagttacagtaaggttcaagcattccgatattttcgaaaaaaaaattatagtatttccagtaacttaggatctgatggcctagttttttccagctatctcggattttttaaggaccatgttttttgcgcaaactctacatttccaatttattccggaaatagttaaaaaaatgttttgagtcgttctgagacccaataattttaattttttggcagatggtgtgtcggcgcaaggcagacggaggtagtcttgtaggcaggct | PCR fusion | | *otEx4741* | Kratsios 2011 |
| *ace-2*  *prom3::2xnls::yfp* | P2NY_Pace-2_180bp | ctccctatgaatatttgaacgacgcgcgcccaaaaaagaaacaaaaggaaagaagaaaatgaggaagaagaataagaaaacgctcttgccgttctctggggaacggctctcaatggctgcggggcgacaaattgagcaatccgaaggagagcttctttcacttttttgctagtgtttcta | pPD95-67 | | *otEx5288* | This paper |
|  | | | | | | |
| *unc-25prom1::gfp* | pMG80 | caaatttgcacttattaagcactaaaaaccaataatttcttccctttaaaatctaaaaaaaatcttccaataacccccccactgataacaacaacaaggcatttttcactcgacgaccggtggcggagcgcacgtcttcttattcttcttcttcttcttcttttcctaccttttctatcccactttttccccggaattttgagatttgacatgatttttcagagaatttcgagttttgagaaaaaaaaaatcaaaaaagcgattttttggtcaaaagccgaaatttaaagctagtttttttggaaatatcgattttttttttgagaatttttcgattttccaaaaaaaaaatcgaaagttgtttcccgaaaagccgaaattttttttgagatatcgaaaaatcggagaatttttcgatgtttcccagaaatactaaaattttgaattttccggaaaaaaaatcgttaaaaaattagtttcttttaaagaccgaaatttaaagttttttttttggaaatatcgattttttccgagatatctaaaattgaaagaaattttcgattttctgagaaaaatacgaaaaaatcgaaaaaaaaacccaaatttcggttttttcgtaaaaaaagtcgtaaaaatgtaatttttttcctgaaaaatcggaattttttacaaaatatcggaaaatactcaaaaaaaagctgaaaatttcgattttccggagaaaaaatctttttaaaaaaatattttttttttcagaaaataagaaaagccgaaatttataactatttctccggaaattcgaaatttttaacgaaatatcggaataatttttagatttttcaagtttgactttgcgagaaaaaaatcggaaaaacctcgattcgacgccgaaaaatgctccttttcgaaaagatttttgaaatttcagaaaatcgacatgcaagcgcgctccacggcgaaatgacaacgatgatccaccgccctcaaaaagttgggtctcgttaggtatttggcggtaaaactggtaaaactccagttttgcctccaacgagacccaattttttggggcggtggtggagcgcgcttgcacaagctgaaagcatttttctgcgactcgataatattttgaaaacctgtgtcaattctcgaaattctttttttaaaaaataatcccgagcttctctcagtcctcctctatgaggatgttccttttttttggtttttcaattttttttaaaattccaaatttctgttgtgcaattcacttccccccaagaaatcccaaaaatccccagttttccccaaaaatgttccgttttcatgtgatttttcccccatttttaaaacatttttttgacttttttttaaaatgattattattattgttttctatttcatggccggtaaattattttttttctttctttttttttgctcttttttttcaagaattttcgaattgtttgaagggctgctcatctaatcttttgtcattttgttctgatgccatcatttctgagaggacctttgaagactcgtcacgaaacgggaggggggctcaagtgagcattattattattattattgtcgcaaaaagtttaccccgggctccccctggctcccctctttgagcaagggtttaagggctcattttgatgacgaattgctcattgggattatagtcacgcccctcttttggagcaactacacaactgagccacagtaatccttgggggcggggtcagtaggaccccctccggaatagggaaaagctcagttcaccgccaaaa | pPD95.75 | *otEx7507,*  *otEx7508,*  *otEx7509* | | This paper |
| *unc-25prom2::gfp* | pMG186 | ctcctctatgaggatgttccttttttttggtttttcaattttttttaaaattccaaatttctgttgtgcaattcacttccccccaagaaatcccaaaaatccccagttttccccaaaaatgttccgttttcatgtgatttttcccccatttttaaaacatttttttgacttttttttaaaatgattattattattgttttctatttcatggccggtaaattattttttttctttctttttttttgctcttttttttcaagaattttcgaattgtttgaagggctgctcatctaatcttttgtcattttgttctgatgccatcatttctgagaggacctttgaagactcgtcacgaaacgggaggggggctcaagtgagcattattattattattattgtcgcaaaaagtttaccccgggctccccctggctcccctctttgagcaagggtttaagggctcattttgatgacgaattgctcattgggattatagtcacgcccctcttttggagcaactacacaactgagccacagtaatccttgggggcggggtcagtaggaccccctccggaatagggaaaagctcagttcaccgccaaaa | pPD95.75 | *otEx7510,*  *otEx7511,*  *otEx7512* | | This paper |
| *unc-25prom3::gfp* | pMG230 | gttttctatttcatggccggtaaattattttttttctttctttttttttgctcttttttttcaagaattttcgaattgtttgaagggctgctcatctaatcttttgtcattttgttctgatgccatcatttctgagaggacctttgaagactcgtcacgaaacgggaggggggctcaagtgagcattattattattattattgtcgcaaaaagtttaccccgggc | pPD95.75 | *otEx7513,*  *otEx7514,*  *otEx7515* | | This paper |
| *unc-25*  *prom3del1::gfp* | pMG247 | gttttctatttcatggccggtaaattattttttttctttctttttttttgctcttttttttcaagaattttcgaattgtttgaagggctgctcatctaatcttttgtcattttgttctgatgccatcatttctgagaggacctttgaagactcgtcacgaaacgggaggggggctcaagtgagcattattattattattattgtcgcaaaaagtttaccccgggc | pPD95.75 | *otEx6850, otEx6851, otEx6852* | | This paper |
| *unc-25prom4::gfp* | pMG231 | cgcaaaaagtttaccccgggctccccctggctcccctctttgagcaagggtttaagggctcattttgatgacgaattgctcattgggattatagtcacgcccctcttttggagcaactacacaactgagccacagtaatccttgggggcggggtcagtaggaccccctccggaatagggaaaagctcagttcaccgccaaaa | pPD95.75 | *otEx6265, otEx6266, otEx6267* | | This paper |
| *unc-25*  *_3intron1::gfp* | pMG225 | gcatgcctgcaggtcgactctagaggatccctgtcaattgctagtcgttcagaaaattcaaatattctcaaaaaaatttcattttcaaagtaataataattccatcgttttttcatatccttgtcccaccaaaaaacatttttttttcatttccaaatcctatttccgcactcatttttctcatttcgccctcggggcacaatataaaccattaacatgctcttttcctcttttctaccagacatctcgaaaacacttgaaaatggggggctccagtgctcttttcatttgcacacacatacaatttccccaaaaaaaggacattacag | pPD95.75 | *otEx7516,*  *otEx7517,*  *otEx7518* | | This paper |
| *unc-25*  *_3intron2::gfp* | pMG228 | gcatgcctgcaggtcgactctagaggatccctcatttcgccctcggggcacaatataaaccattaacatgctcttttcctcttttctaccagacatctcgaaaacacttgaaaatggggggctccagtgctcttttcatttgcacacacatacaatttccccaaaaaaaggacattacag | pPD95.75 | *otEx7519,*  *otEx7520,*  *otEx7521* | | This paper |
|  | | | | | | |
| *unc-47prom1::gfp* | pMG71 | gccaataaactcactatagtcgctggttcccccctattcacatttattctaccaatccatcagtggaaccagaaaaaagaagagcctttcggtttggagagtagggtctaataatcccccgtgctcttcaaatcattgtgccaacacacagacacactttatgtgtgctcacacacacacgctatttgaagagcgaagacgacgacgacgcattcagagctcttttccacgaaatttgctccatctttccacaatctgtctttcctgtgagacgacagcgtcacatttatttcattacag | pPD95.75 | *otEx7522,*  *otEx7523,*  *otEx7524* | | This paper |
| *unc-47*  *prom1::mCHOPTI* | pMG92 | gccaataaactcactatagtcgctggttcccccctattcacatttattctaccaatccatcagtggaaccagaaaaaagaagagcctttcggtttggagagtagggtctaataatcccccgtgctcttcaaatcattgtgccaacacacagacacactttatgtgtgctcacacacacacgctatttgaagagcgaagacgacgacgacgcattcagagctcttttccacgaaatttgctccatctttccacaatctgtctttcctgtgagacgacagcgtcacatttatttcattacag | pOH590 | *otIs348,*  *otIs374* | | *otIs348*: Kratsios P et al, Nat Neuro, 2012 |
| *unc-47prom2::gfp* | pMG77 | gtagggtctaataatcccccgtgctcttcaaatcattgtgccaacacacagacacactttatgtgtgctcacacacacacgctatttgaagagcgaagacgacgacgacgcattcagagctcttttccacgaaatttgctccatctttccacaatctgtctttcctgtgagacgacagcgtcacatttatttcattacag | pPD95.75 | *otEx7525, otEx7526, otEx7527*  *otIs515, otIs516, otIs522, otIs523* | | This paper |
| *unc-47prom3::gfp)* | pMG221 | gccaataaactcactatagtcgctggttcccccctattcacatttattctaccaatccatcagtggaaccagaaaaaagaagagcctttcggtttggagagtagggtctaataatcccccgtgctcttcaaatcattgtgccaacacacagacacactttatgtgtgctcacacacacacgctatttgaagagcgaagac | pPD95.75 | *otEx7528, otEx7529, otEx7530* | | This paper |
|  | | | | | | |
| *unc-46prom1::gfp* | pMG117 | gttgtacatgcggcaaatgacaaaaacgatgaaaaatagaaagaaagaaagatgggtcgtagaatggaatacatcaaaagagcttaaaagtgtgtgctcattttgggggtcctggtcctccaatccgtgctccacacggaattatttgttcttcttcttcttcttcgtcgcttttcttcatcttcaaaagtgtctcctcaacatccttcgtttcttcgcaaaaacaagatttta | pPD95.75 | *otEx7531, otEx7532, otEx7533,*  *otIs573, otIs574, otIs575* | | This paper  otIs575: Gendrel et al, Elife, 2016 |
| *unc-46prom2::gfp* | pMG139 | cttaaaagtgtgtgctcattttgggggtcctggtcctccaatccgtgctccacacggaattatttgttcttcttcttcttcttcgtcgcttttcttcatcttcaaaagtgtctcctcaacatccttcgtttcttcgcaaaaacaagatttta | pPD95.75 | *otEx7534, otEx7535, otEx7536, otEx7537* | | This paper |
| *unc-46prom3::gfp* | pMG140 | gttgtacatgcggcaaatgacaaaaacgatgaaaaatagaaagaaagaaagatgggtcgtagaatggaatacatcaaaagagcttaaaagtgtgtgctcattttgggggtcctggtcctccaatccgtgctccacacggaattatttgttc | pPD95.75 | *otEx7538, otEx7539, otEx75340* | | This paper |

| **Gene** | **Fosmid** | **Strain name** | **Transgene name** | **Ref.** |
| --- | --- | --- | --- | --- |
| *cho-1fosmid::sl2::nls-yfp-h2b* | WRM0613dC12 | *OH13470* | *otIs354* | Stefanakis et al, 2015 |
| *cho-1fosmid-COE mut::sl2::nls-yfp-h2b* | WRM0613dC12 | *OH13172* | *otEx6066* | Stefanakis et al, 2015 |
| *ace-2fosmid::sl2::nls::gfp* | WRM0641bD11 | *OH9969* | *otEx4431* | Kratsios etal., 2011 |
